# Supplementary material for: Epidemiology, Molecular Characteristics, and Clinical Risk Factors of Klebsiella pneumoniae Bloodstream Infections: A Nine-Year Retrospective Study (2016–2024)
Source: Research Square preprint supplement (doi:10.21203/rs.3.rs-7873537/v1), 2025-11-25
Supplement: Supplementary file 1 [file 03d84944e515765fcacd180c.docx]

Table S20. Multivariable and Univariate analyses of Risk Factors for ST23 and ST65 in *Klebsiella pneumoniae* Bloodstream Infection. A p value of less than 0.05 was set as the threshold for significance.

| **Variables** | **ST23 (n=86)** | | **ST65 (n=48)** | **Total**  **(n=134)** | **Univariate**  **analysis OR** | **Lower** | **Upper** | **P value** | **Multivariate analysis**  **OR** | **Lower** | **Upper** | **P value** |
| --- | --- | --- | --- | --- | --- | --- | --- | --- | --- | --- | --- | --- |
| Agender (male) | | 69 (80.2%) | 31 (64.6%) | 100 (74.6%) | 2.226 | 1.005 | 4.927 | **0.046** | 2.07 | 0.79 | 5.421 | 0.139 |
| Age≥60 | | 42 (48.8%) | 25 (52.1%) | 67 (50%) | 0.878 | 0.433 | 1.78 | 0.719 |  |  |  |  |
| Mortality | | 11 (12.8%) | 14 (29.2%) | 25 (18.7%) | 0.356 | 0.147 | 0.865 | **0.02** | 0.619 | 0.197 | 1.943 | 0.411 |
| Department (ICU) | | 20 (23.3%) | 13 (27.1%) | 33 (24.6%) | 0.816 | 0.363 | 1.833 | 0.622 |  |  |  |  |
| Malignancy | | 4 (4.7%) | 12 (25%) | 16 (11.9%) | 0.146 | 0.044 | 0.485 | **＜0.001** | 0.354 | 0.082 | 1.534 | 0.165 |
| Cardiovascular disease | | 15 (17.4%) | 8 (16.7%) | 23 (17.2%) | 1.056 | 0.412 | 2.708 | 0.909 |  |  |  |  |
| Cerebrovascular disease | | 11 (12.8%) | 11 (22.9%) | 22 (16.4%) | 0.493 | 0.196 | 1.243 | 0.129 |  |  |  |  |
| Autoimmune disease | | 1 (1.5%) | 1 (2.1%) | 2 (1.5%) | 0.553 | 0.034 | 9.044 | 0.673 |  |  |  |  |
| Agranulocytosis | | 1 (1.2%) | 2 (4.2%) | 3 (2.2%) | 0.271 | 0.024 | 3.065 | 0.26 |  |  |  |  |
| Chronic renal insufficiency | | 10 (11.6%) | 4 (8.3%) | 14 (10.4%) | 1.447 | 0.428 | 4.89 | 0.55 |  |  |  |  |
| Chronic obstructive  pulmonary disease | | 2 (2.3%) | 1 (2.1%) | 3 (2.2%) | 1.119 | 0.099 | 12.671 | 0.928 |  |  |  |  |
| Pulmonary infection | | 37 (43%) | 15 (31.3%) | 52 (38.8%) | 1.661 | 0.789 | 3.499 | 0.18 |  |  |  |  |
| Urinary tract infection | | 7 (8.1%) | 1 (2.1%) | 8 (6%) | 4.165 | 0.497 | 34.91 | 0.156 |  |  |  |  |
| Biliary tract infection | | 4 (4.7%) | 6 (12.5%) | 10 (7.5%) | 0.341 | 0.091 | 1.277 | 0.097 |  |  |  |  |
| Hypertension | | 43 (50%) | 17 (35.4%) | 60 (44.8%) | 1.824 | 0.881 | 3.773 | 0.104 |  |  |  |  |
| Diabetes mellitus | | 26 (30.2%) | 8 (16.7%) | 34 (25.4%) | 2.167 | 0.892 | 5.264 | 0.084 |  |  |  |  |
| Invasive procedures | | 59（68.6%) | 34 (70.8%) | 93 (69.4%) | 0.9 | 0.416 | 1.946 | 0.788 |  |  |  |  |
| Therapeutic procedure(catheter) | | 46 (53.5%) | 30 (62.5%) | 76 (56.7%) | 0.69 | 0.335 | 1.42 | 0.313 |  |  |  |  |
| Vascular catheter 1 | | 35 (40.7%) | 22 (45.8%) | 57 (42.5%) | 0.811 | 0.398 | 1.654 | 0.564 |  |  |  |  |
| Urinary catheter 2 | | 37 (43%) | 26 (54.2%) | 63 (47%) | 0.639 | 0.314 | 1.3 | 0.215 |  |  |  |  |
| Mechanical ventilation 3 | | 25 (29.1%) | 23 (47.9%) | 48 (35.8%) | 0.445 | 0.214 | 0.927 | **0.029** | 0.574 | 0.22 | 1.496 | 0.256 |
| 1+2 | | 21 (24.4%) | 16 (33.3%) | 37 (27.6%) | 0.646 | 0.297 | 1.404 | 0.268 |  |  |  |  |
| 1+3 | | 16 (18.6%) | 4 (8.3%) | 20 (14.9%) | 2.514 | 0.789 | 8.01 | 0.11 |  |  |  |  |
| 2+3 | | 20 (23.3%) | 8 (16.7%) | 28 (20.9%) | 1.515 | 0.61 | 3.761 | 0.368 |  |  |  |  |
| 1+2+3 | | 15 (17.4%) | 4 (8.3%) | 19 (14.2%) | 2.324 | 0.725 | 7.452 | 0.147 |  |  |  |  |
| Previous corticosteroid therapy | | 0 | 1 (2.1%) | 1 (0.7%) |  |  |  | 0.179 |  |  |  |  |
| Previous antibiotic therapy | | 10 (11.6%) | 30 (62.5%) | 40 (29.9%) | 0.079 | 0.033 | 0.191 | **＜0.001** | 0.121 | 0.046 | 0.315 | **＜0.001** |
| Alcohol Drinking History | | 7 (8.1%) | 6 (12.5%) | 13 (9.7%) | 0.62 | 0.196 | 1.965 | 0.414 |  |  |  |  |
| Smoking History | | 7 (8.1%) | 6 (12.5%) | 13 (9.7%) | 0.62 | 0.196 | 1.965 | 0.414 |  |  |  |  |

OR: Odds Ratio; Upper and Lower: 95% CI (confidence interval);1+2: Vascular catheter+ Urinary catheter;1+3: Vascular catheter+ Mechanical ventilation;2+3: Urinary catheter+ Mechanical ventilation;1+2+3:Vascular catheter+ Urinary catheter+ Mechanical ventilation.
