# Supplementary material for: Epidemiology, Molecular Characteristics, and Clinical Risk Factors of Klebsiella pneumoniae Bloodstream Infections: A Nine-Year Retrospective Study (2016–2024)
Source: Research Square preprint supplement (doi:10.21203/rs.3.rs-7873537/v1), 2025-11-25
Supplement: Supplementary file 2 [file 147a31b52f256a3fd40677fc.docx]

Table S4. Multivariable and Univariate analyses of Risk Factors for *rmpA* and *iroN* in *Klebsiella pneumoniae* Bloodstream Infection. A p value of less than 0.05 was set as the threshold for significance.

| **Variables** | ***rmpA* (n=302）** | | ***iroN* (n=664）** | | **Total**  **(n=968)** | | | **Univariate**  **analysis**  **OR** | | **Lower** | **Upper** | **P value** | **Multivariate analysis**  **OR** | **Lower** | **Upper** | **P value** |
| --- | --- | --- | --- | --- | --- | --- | --- | --- | --- | --- | --- | --- | --- | --- | --- | --- |
| Agender (male) | 220 (72.8%) | 477 (71.8%) | | | | | 697 (72.2%) | 1.052 | 0.775 | | 1.427 | 0.745 |  |  |  |  |
| Age≥60 | 177 (58.6%) | 371 (55.9%) | | | | | 548 (56.7%) | 1.118 | 0.849 | | 1.473 | 0.426 |  |  |  |  |
| Mortality | 30 (9.9%) | 74 (11.1%) | | | | | 104 (10.8%) | 0.879 | 0.562 | | 1.376 | 0.574 |  |  |  |  |
| Department (ICU) | 81 (26.8%) | | | 176 (26.5%) | | 257 (26.6%) | | 1.016 | 0.747 | | 1.382 | 0.918 |  |  |  |  |
| Malignancy | 27 (8.9%) | | | 81 (12.2%) | | 108 (11.2%) | | 0.707 | 0.447 | | 1.118 | 0.136 |  |  |  |  |
| Cardiovascular disease | 57 (18.9%) | | | 129 (19.4%) | | 186 (19.3%) | | 0.965 | 0.682 | | 1.364 | 0.84 |  |  |  |  |
| Cerebrovascular disease | 34 (11.3%) | | | 81 (12.2%) | | 115 (11.9%) | | 0.913 | 0.596 | | 1.398 | 0.676 |  |  |  |  |
| Autoimmune disease | 7 (2.3%) | | | 14 (2.1%) | | 21 (2.2%) | | 1.102 | 0.44 | | 2.758 | 0.836 |  |  |  |  |
| Agranulocytosis | 9 (3%) | | | 28 (4.2%) | | 37 (3.8%) | | 0.698 | 0.325 | | 1.497 | 0.353 |  |  |  |  |
| Chronic renal insufficiency | 19 (6.3%) | | | 70 (10.5%) | | 89 (9.2%) | | 0.57 | 0.337 | | 0.964 | **0.034** | 0.57 | 0.337 | 0.964 | **0.036** |
| Chronic obstructive  pulmonary disease | 4 (1.3%) | | | 4 (0.6%) | | 8 (0.8%) | | 2.215 | 0.55 | | 8.915 | 0.251 |  |  |  |  |
| Pulmonary infection | 129 (42.7%) | | | 296 (44.6%) | | 425 (44%) | | 0.927 | 0.704 | | 1.22 | 0.589 |  |  |  |  |
| Urinary tract infection | 30 (9.9%) | | | 60 (9%) | | 90 (9.3%) | | 1.11 | 0.7 | | 1.761 | 0.656 |  |  |  |  |
| Biliary tract infection | 37 (12.3%) | | | 109 (16.4%) | | 146 (15.1%) | | 0.711 | 0.476 | | 1.061 | 0.094 |  |  |  |  |
| Hypertension | 135 (44.7%) | | | 312 (47%) | | 447 (46.3%) | | 0.912 | 0.694 | | 1.199 | 0.509 |  |  |  |  |
| Diabetes mellitus | 108 (35.8%) | | | 218 (32.8%) | | 326 (33.7%) | | 1.139 | 0.856 | | 1.516 | 0.372 |  |  |  |  |
| Invasive procedures | 180 (59.6%) | | | 374 (56.3%) | | 554 (57.3%) | | 1.144 | 0.868 | | 1.508 | 0.34 |  |  |  |  |
| Therapeutic procedure(catheter) | 195 (64.6%) | | | 452 (68.1%) | | 647 (67%) | | 0.855 | 0.642 | | 1.139 | 0.283 |  |  |  |  |
| Vascular catheter 1 | 151 (50%) | | | 363 (54.7%) | | 514 (53.2%) | | 0.829 | 0.631 | | 1.089 | 0.178 |  |  |  |  |
| Urinary catheter 2 | 163 (54%) | | | 382 (57.5%) | | 545 (56.4%) | | 0.866 | 0.658 | | 1.138 | 0.301 |  |  |  |  |
| Mechanical ventilation 3 | 124 (41.1%) | | | 266 (40.1%) | | 390 (40.4%) | | 1.042 | 0.79 | | 1.375 | 0.769 |  |  |  |  |
| 1+2 | 118（39.1%) | | | 297 (44.7%) | | 415 (43%) | | 0.792 | 0.601 | | 1.046 | 0.100 |  |  |  |  |
| 1+3 | 101 (33.4%) | | | 234 (35.2%) | | 335 (34.7%) | | 0.923 | 0.693 | | 1.231 | 0.586 |  |  |  |  |
| 2+3 | 120 (39.7%) | | | 261 (39.3%) | | 381 (39.4%) | | 1.018 | 0.771 | | 1.345 | 0.900 |  |  |  |  |
| 1+2+3 | 97 (32.1%) | | | 229 (34.5%) | | 326 (33.7%) | | 0.899 | 0.673 | | 1.201 | 0.47 |  |  |  |  |
| Previous corticosteroid therapy | 12 (4%) | | | 33 (5%) | | 45 (4.7%) | | 0.791 | 0.403 | | 1.554 | 0.496 |  |  |  |  |
| Previous antibiotic therapy | 73 (24.2%) | | | 187 (28.2%) | | 260 (26.9%) | | 0.813 | 0.595 | | 1.112 | 0.195 |  |  |  |  |
| Alcohol Drinking History | 21 (7%) | | | 57 (8.6%) | | 78 (8.1%) | | 0.796 | 0.473 | | 1.339 | 0.388 |  |  |  |  |
| Smoking History | 30 (9.9%) | | | 85 (12.8%) | | 115 (11.9%) | | 0.751 | 0.484 | | 1.167 | 0.202 |  |  |  |  |

OR: Odds Ratio; Upper and Lower: 95% CI (confidence interval);1+2: Vascular catheter+ Urinary catheter;1+3: Vascular catheter+ Mechanical ventilation;2+3: Urinary catheter+ Mechanical ventilation;1+2+3:Vascular catheter+ Urinary catheter+ Mechanical ventilation.
