# Supplementary material for: Epidemiology, Molecular Characteristics, and Clinical Risk Factors of Klebsiella pneumoniae Bloodstream Infections: A Nine-Year Retrospective Study (2016–2024)
Source: Research Square preprint supplement (doi:10.21203/rs.3.rs-7873537/v1), 2025-11-25
Supplement: Supplementary file 3 [file 15f0e7df8731b06756464fb1.docx]

Table S8. Multivariable and Univariate analyses of Risk Factors for *iutA* and non-*iutA* in *Klebsiella pneumoniae* Bloodstream Infection. A p value of less than 0.05 was set as the threshold for significance.

| **Variables** | ***iutA* (n=546)** | | **Non *iutA* (n=285)** | **Total**  **(n=831)** | **Univariate**  **analysis**  **OR** | **Lower** | **Upper** | **P value** | **Multivariate analysis**  **OR** | **Lower** | **Upper** | **P value** |
| --- | --- | --- | --- | --- | --- | --- | --- | --- | --- | --- | --- | --- |
| Agender (male) | | 391 (71.6%) | 194 (68.1%) | 585 (70.4%) | 1.183 | 0.867 | 1.615 | 0.288 |  |  |  |  |
| Age≥60 | | 304 (55.7%) | 152 (53.3%) | 456 (54.9%) | 1.099 | 0.825 | 1.465 | 0.519 |  |  |  |  |
| Mortality | | 61 (11.2%) | 31 (10.9%) | 92（11.1%) | 1.031 | 0.652 | 1.629 | 0.898 |  |  |  |  |
| Department (ICU) | | 147 (26.9%) | 65 (22.8%) | 212 (25.5%) | 1.247 | 0.892 | 1.743 | 0.196 |  |  |  |  |
| Malignancy | | 63 (11.5%) | 28 (9.8%) | 91 (11%) | 1.197 | 0.748 | 1.916 | 0.453 |  |  |  |  |
| Cardiovascular disease | | 98 (17.9%) | 53 (18.6%) | 151 (18.2%) | 0.958 | 0.661 | 1.386 | 0.818 |  |  |  |  |
| Cerebrovascular disease | | 63 (11.5%) | 29 (10.2%) | 92 (11.1%) | 1.151 | 0.723 | 1.833 | 0.552 |  |  |  |  |
| Autoimmune disease | | 13 (2.4%) | 2 (0.7%) | 15 (1.8%) | 3.451 | 0.773 | 15.4 | 0.084 |  |  |  |  |
| Agranulocytosis | | 21 (3.8%) | 15 (5.3%) | 36 (4.3%) | 0.72 | 0.365 | 1.419 | 0.341 |  |  |  |  |
| Chronic renal insufficiency | | 44 (8.1%) | 33 (11.6%) | 77 (9.3%) | 0.669 | 0.416 | 1.077 | 0.097 |  |  |  |  |
| Chronic obstructive  pulmonary disease | | 4 (0.7%) | 2 (0.7%) | 6 (0.7%) | 1.044 | 0.19 | 5.736 | 0.96 |  |  |  |  |
| Pulmonary infection | | 235 (43%) | 114 (40%) | 349 (42%) | 1.133 | 0.847 | 1.517 | 0.399 |  |  |  |  |
| Urinary tract infection | | 53 (9.7%) | 29 (10.2%) | 82 (9.9%) | 0.949 | 0.589 | 1.529 | 0.83 |  |  |  |  |
| Biliary tract infection | | 96 (17.6%) | 44 (15.4%) | 140 (16.8%) | 1.168 | 0.791 | 1.725 | 0.433 |  |  |  |  |
| Hypertension | | 256 (46.9%) | 124 (43.3%) | 380 (45.7%) | 1.146 | 0.859 | 1.529 | 0.354 |  |  |  |  |
| Diabetes mellitus | | 181 (33.2%) | 82 (28.8%) | 263 (31.6%) | 1.228 | 0.898 | 1.678 | 0.198 |  |  |  |  |
| Invasive procedures | | 305 (55.9%) | 192 (67.4%) | 497 (59.8%) | 0.613 | 0.454 | 0.827 | **0.001** | 0.587 | 0.433 | 0.794 | **0.001** |
| Therapeutic procedure(catheter) | | 356 (65.2%) | 191 (67%) | 547 (65.8%) | 0.922 | 0.681 | 1.249 | 0.6 |  |  |  |  |
| Vascular catheter 1 | | 287 (52.6%) | 141 (49.5%) | 428 (51.5%) | 1.132 | 0.85 | 1.507 | 0.397 |  |  |  |  |
| Urinary catheter 2 | | 305 (55.9%) | 157 (55.1%) | 462 (55.6%) | 1.032 | 0.774 | 1.376 | 0.831 |  |  |  |  |
| Mechanical ventilation 3 | | 209 (38.3%) | 107（37.5%) | 316 (38%) | 1.032 | 0.768 | 1.386 | 0.836 |  |  |  |  |
| 1+2 | | 237 (43.4%) | 109 (38.2%) | 346 (41.6%) | 1.238 | 0.924 | 1.66 | 0.152 |  |  |  |  |
| 1+3 | | 188 (34.4%) | 85 (29.8%) | 273 (32.9%) | 1.236 | 0.907 | 1.683 | 0.179 |  |  |  |  |
| 2+3 | | 204 (37.4%) | 104 (36.5%) | 308 (37.1%) | 1.038 | 0.771 | 1.397 | 0.805 |  |  |  |  |
| 1+2+3 | | 183 (33.5%) | 82 (28.8%) | 265 (31.9%) | 1.248 | 0.914 | 1.705 | 0.164 |  |  |  |  |
| Previous corticosteroid therapy | | 25 (4.6%) | 15 (5.3%) | 40 (4.8%) | 0.864 | 0.448 | 1.666 | 0.662 |  |  |  |  |
| Previous antibiotic therapy | | 166 (30.4%) | 61 (21.4%) | 227 (27.3%) | 1.604 | 1.146 | 2.246 | **0.06** | 1.695 | 1.205 | 2.382 | **0.002** |
| Alcohol Drinking History | | 49 (9%) | 16 (5.6%) | 65 (7.8%) | 1.658 | 0.925 | 2.971 | 0.087 |  |  |  |  |
| Smoking History | | 71 (13%) | 25 (8.8%) | 96 (11.6%) | 1.555 | 0.962 | 2.513 | 0.07 |  |  |  |  |

OR: Odds Ratio; Upper and Lower: 95% CI (confidence interval);1+2: Vascular catheter+ Urinary catheter;1+3: Vascular catheter+ Mechanical ventilation;2+3: Urinary catheter+ Mechanical ventilation;1+2+3:Vascular catheter+ Urinary catheter+ Mechanical ventilation.
