# Supplementary material for: Epidemiology, Molecular Characteristics, and Clinical Risk Factors of Klebsiella pneumoniae Bloodstream Infections: A Nine-Year Retrospective Study (2016–2024)
Source: Research Square preprint supplement (doi:10.21203/rs.3.rs-7873537/v1), 2025-11-25
Supplement: Supplementary file 4 [file 17a77fce094fef87c397c914.docx]

Table S13. Multivariable and Univariate analyses of Risk Factors for K2 and non-K2 in *Klebsiella pneumoniae* Bloodstream Infection. A p value of less than 0.05 was set as the threshold for significance.

| **Variables** | **K2 (n=55)** | | **Non-K2 (n=773)** | **Total**  **(n=828)** | **Univariate**  **analysis OR** | **Lower** | **Upper** | **P value** | **Multivariate analysis**  **OR** | **Lower** | **Upper** | **P value** |
| --- | --- | --- | --- | --- | --- | --- | --- | --- | --- | --- | --- | --- |
| Agender (male) | | 33 (60%) | 549 (71%) | 582 (70.3%) | 0.612 | 0.349 | 1.073 | 0.084 |  |  |  |  |
| Age≥60 | | 33 (60%) | 420 (54.3%) | 453 (54.7%) | 1.261 | 0.722 | 2.202 | 0.415 |  |  |  |  |
| Mortality | | 4 (7.3%) | 86 (11.1%) | 90 (10.9%) | 0.627 | 0.221 | 1.776 | 0.375 |  |  |  |  |
| Department (ICU) | | 14 (25.5%) | 191 (24.7%) | 205 (24.8%) | 1.04 | 0.555 | 1.95 | 0.901 |  |  |  |  |
| Malignancy | | 9 (16.4%) | 82 (10.6%) | 91 (11%) | 1.649 | 0.779 | 3.491 | 0.187 |  |  |  |  |
| Cardiovascular disease | | 10 (18.2%) | 136 (17.6%) | 146 (17.6%) | 1.041 | 0.512 | 2.117 | 0.912 |  |  |  |  |
| Cerebrovascular disease | | 5 (9.1%) | 88 (11.4%) | 93 (11.2%) | 0.778 | 0.302 | 2.004 | 0.603 |  |  |  |  |
| Autoimmune disease | | 0 | 22 (2.8%) | 22 (2.7%) |  |  |  | 0.205 |  |  |  |  |
| Agranulocytosis | | 2 (3.6%) | 32 (4.1%) | 34 (4.1%) | 0.874 | 0.204 | 3.746 | 0.856 |  |  |  |  |
| Chronic renal insufficiency | | 5 (9.1%) | 72 (9.3%) | 77 (9.3%) | 0.974 | 0.376 | 2.159 | 0.956 |  |  |  |  |
| Chronic obstructive  pulmonary disease | | 0 | 7 (0.9%) | 7 (0.8%) |  |  |  | 0.478 |  |  |  |  |
| Pulmonary infection | | 27 (49.1%) | 325 (42%) | 352 (42.5%) | 1.329 | 0.769 | 2.298 | 0.307 |  |  |  |  |
| Urinary tract infection | | 2 (3.6%) | 72 (9.3%) | 74 (8.9%) | 0.367 | 0.088 | 1.539 | 0.154 |  |  |  |  |
| Biliary tract infection | | 11 (20%) | 131 (16.9%) | 142 (17.1%) | 1.225 | 0.616 | 2.435 | 0.562 |  |  |  |  |
| Hypertension | | 26 (47.3%) | 354 (45.8%) | 380 (45.9%) | 1.061 | 0.614 | 1.835 | 0.832 |  |  |  |  |
| Diabetes mellitus | | 12 (21.8%) | 248 (32.1%) | 260 (31.4%) | 0.591 | 0.306 | 1.14 | 0.113 |  |  |  |  |
| Invasive procedures | | 28 (50.9%) | 473 (61.2%) | 501 (60.5%) | 0.658 | 0.38 | 1.138 | 0.132 |  |  |  |  |
| Therapeutic procedure(catheter) | | 33 (60%) | 508 (65.7%) | 541 (65.3%) | 0.782 | 0.447 | 1.369 | 0.389 |  |  |  |  |
| Vascular catheter 1 | | 29 (52.7%) | 389 (50.3%) | 418 (50.5%) | 1.101 | 0.637 | 1.904 | 0.73 |  |  |  |  |
| Urinary catheter 2 | | 25 (45.5%) | 428 (55.4%) | 453 (54.7%) | 0.672 | 0.388 | 1.164 | 0.154 |  |  |  |  |
| Mechanical ventilation 3 | | 19 (34.5%) | 283 (36.6%) | 302 (36.5%) | 0.914 | 0.514 | 1.624 | 0.759 |  |  |  |  |
| 1+2 | | 22 (40%) | 314 (40.6%) | 336 (40.6%) | 0.975 | 0.558 | 1.703 | 0.928 |  |  |  |  |
| 1+3 | | 18 (32.7%) | 246 (31.8%) | 264 (31.9%) | 1.042 | 0.582 | 1.867 | 0.89 |  |  |  |  |
| 2+3 | | 18 (32.7%) | 272 (35.2%) | 290 (35%) | 0.896 | 0.501 | 1.604 | 0.712 |  |  |  |  |
| 1+2+3 | | 17 (30.9%) | 238 (30.8%) | 255 (30.8%) | 1.006 | 0.556 | 1.818 | 0.985 |  |  |  |  |
| Previous corticosteroid therapy | | 0 | 40 (5.2%) | 40 (4.8%) |  |  |  | 0.084 |  |  |  |  |
| Previous antibiotic therapy | | 14 (25.5%) | 208 (26.9%) | 222（26.85) | 0.928 | 0.495 | 1.737 | 0.814 |  |  |  |  |
| Alcohol Drinking History | | 5 (9.1%) | 57 (7.4%) | 62 (7.5%) | 1.256 | 0.482 | 3.274 | 0.64 |  |  |  |  |
| Smoking History | | 6 (10.9%) | 88 (11.4%) | 94 (11.4%) | 0.953 | 0.397 | 2.289 | 0.915 |  |  |  |  |

OR: Odds Ratio; Upper and Lower: 95% CI (confidence interval);1+2: Vascular catheter+ Urinary catheter;1+3: Vascular catheter+ Mechanical ventilation;2+3: Urinary catheter+ Mechanical ventilation;1+2+3:Vascular catheter+ Urinary catheter+ Mechanical ventilation.
