# Supplementary material for: Epidemiology, Molecular Characteristics, and Clinical Risk Factors of Klebsiella pneumoniae Bloodstream Infections: A Nine-Year Retrospective Study (2016–2024)
Source: Research Square preprint supplement (doi:10.21203/rs.3.rs-7873537/v1), 2025-11-25
Supplement: Supplementary file 5 [file 30ebfdc527c5b752c9cc8507.docx]

Table S10. Multivariable and Univariate analyses of Risk Factors for K47 and K2 in *Klebsiella pneumoniae* Bloodstream Infection. A p value of less than 0.05 was set as the threshold for significance.

| **Variables** | **K47 (n=68)** | | **K2 (n=55)** | **Total**  **(n=123)** | **Univariate**  **analysis OR** | **Lower** | **Upper** | **P value** | **Multivariate analysis**  **OR** | **Lower** | **Upper** | **P value** |
| --- | --- | --- | --- | --- | --- | --- | --- | --- | --- | --- | --- | --- |
| Agender (male) | | 54 (79.4%) | 33 (60%) | 87 (70.7%) | 2.571 | 1.158 | 5.71 | **0.019** | 2.756 | 1.182 | 6.428 | **0.019** |
| Age≥60 | | 45 (66.2%) | 33 (60%) | 78 (63.4%) | 1.304 | 0.624 | 2.726 | 0.48 |  |  |  |  |
| Mortality | | 7 (10.3%) | 4 (7.3%) | 11 (8.9%) | 1.463 | 0.405 | 5.281 | 0.559 |  |  |  |  |
| Department (ICU) | | 20 (29.4%) | 14 (25.5%) | 34 (27.6%) | 1.22 | 0.548 | 2.716 | 0.626 |  |  |  |  |
| Malignancy | | 18 (26.5%) | 9 (16.4%) | 27 (22%) | 1.84 | 0.752 | 4.502 | 0.178 |  |  |  |  |
| Cardiovascular disease | | 14 (20.6%) | 10 (18.2%) | 24 (19.5%) | 1.167 | 0.473 | 2.878 | 0.738 |  |  |  |  |
| Cerebrovascular disease | | 10 (14.7%) | 5 (9.1%) | 15 (12.2%) | 1.724 | 0.552 | 5.381 | 0.344 |  |  |  |  |
| Autoimmune disease | | 3 (4.4%) | 0 | 3 (2.4%) |  |  |  | 0.015 |  |  |  |  |
| Agranulocytosis | | 1 (1.5%) | 2 (3.6%) | 3 (2.4%) | 0.396 | 0.035 | 4.481 | 0.439 |  |  |  |  |
| Chronic renal insufficiency | | 9 (13.2%) | 5 (9.1%) | 14 (11.4%) | 1.525 | 0.48 | 4.848 | 0.472 |  |  |  |  |
| Chronic obstructive  pulmonary disease | | 0 | 0 | 0 |  |  |  |  |  |  |  |  |
| Pulmonary infection | | 28 (41.2%) | 27 (49.1%) | 55 (44.7%) | 0.726 | 0.355 | 1.485 | 0.38 |  |  |  |  |
| Urinary tract infection | | 5 (7.4%) | 2 (3.6%) | 7 (5.7%) | 2.103 | 0.392 | 11.285 | 0.376 |  |  |  |  |
| Biliary tract infection | | 14 (20.6%) | 11 (20%) | 25 (20.3%) | 1.037 | 0.428 | 2.511 | 0.936 |  |  |  |  |
| Hypertension | | 39 (57.4%) | 26 (47.3%) | 65 (52.8%) | 1.5 | 0.734 | 3.066 | 0.265 |  |  |  |  |
| Diabetes mellitus | | 30 (44.1%) | 12 (21.8%) | 42 (34.1%) | 2.829 | 1.272 | 6.29 | **0.01** | 2.86 | 1.239 | 6.6 | **0.014** |
| Invasive procedures | | 42 (61.8%) | 28 (50.9%) | 70 (56.9%) | 1.558 | 0.758 | 3.201 | 0.227 |  |  |  |  |
| Therapeutic procedure(catheter) | | 48 (70.6%) | 33 (60%) | 81 (65.9%) | 1.6 | 0.755 | 3.389 | 0.218 |  |  |  |  |
| Vascular catheter 1 | | 35（51.5%) | 29 (52.7%) | 64 (52%) | 0.951 | 0.467 | 1.937 | 0.89 |  |  |  |  |
| Urinary catheter 2 | | 45 (66.2%) | 25 (45.5%) | 70 (56.9%) | 2.348 | 1.131 | 4.876 | **0.021** | 2.528 | 1.163 | 5.494 | **0.019** |
| Mechanical ventilation 3 | | 20 (29.4%) | 19 (34.5%) | 39 (31.7%) | 0.789 | 0.368 | 1.692 | 0.543 |  |  |  |  |
| 1+2 | | 32 (47.1%) | 22 (40%) | 54 (43.9%) | 1.333 | 0.649 | 2.738 | 0.433 |  |  |  |  |
| 1+3 | | 19 (27.9%) | 18 (32.7%) | 37 (30.1%) | 0.797 | 0.368 | 1.727 | 0.565 |  |  |  |  |
| 2+3 | | 20 (29.4%) | 18 (32.7%) | 38 (30.9%) | 0.856 | 0.397 | 1.846 | 0.692 |  |  |  |  |
| 1+2+3 | | 19 (27.9%) | 17 (30.9%) | 36 (29.3%) | 0.867 | 0.398 | 1.89 | 0.719 |  |  |  |  |
| Previous corticosteroid therapy | | 4 (5.9%) | 0 | 4 (3.3%) |  |  |  | 0.067 |  |  |  |  |
| Previous antibiotic therapy | | 21 (30.9%) | 14 (25.5%) | 35 (28.5%) | 1.309 | 0.591 | 2.899 | 0.507 |  |  |  |  |
| Alcohol Drinking History | | 4 (5.9%) | 5 (9.1%) | 9 (7.3%) | 0.625 | 1.59 | 2.449 | 0.497 |  |  |  |  |
| Smoking History | | 6 (8.8%) | 6 (10.9%) | 12 (9.8%) | 0.79 | 0.24 | 2.603 | 0.698 |  |  |  |  |

OR: Odds Ratio; Upper and Lower: 95% CI (confidence interval);1+2: Vascular catheter+ Urinary catheter;1+3: Vascular catheter+ Mechanical ventilation;2+3: Urinary catheter+ Mechanical ventilation;1+2+3:Vascular catheter+ Urinary catheter+ Mechanical ventilation.
