# Supplementary material for: Epidemiology, Molecular Characteristics, and Clinical Risk Factors of Klebsiella pneumoniae Bloodstream Infections: A Nine-Year Retrospective Study (2016–2024)
Source: Research Square preprint supplement (doi:10.21203/rs.3.rs-7873537/v1), 2025-11-25
Supplement: Supplementary file 6 [file 3fe27abdc76205b1c6937748.docx]

Table S2. Multivariable and Univariate analyses of Risk Factors for *rmpA* and *rmpA2* in *Klebsiella pneumoniae* Bloodstream Infection. A p value of less than 0.05 was set as the threshold for significance.

| **Variables** | | ***rmpA* (n=302）** | ***rmpA2* (n=192）** | **Total(n=831)** | **Univariate**  **analysis**  **OR** | **Lower** | **Upper** | **P value** | **Multivariate analysis**  **OR** | **Lower** | **Upper** | **P value** |
| --- | --- | --- | --- | --- | --- | --- | --- | --- | --- | --- | --- | --- |
| Agender (male) | | 220 (72.8%) | 146 (76%) | 366 (74.1%) | 0.845 | 0.557 | 1.283 | 0.43 |  |  |  |  |
| Age≥60 | | 177 (58.6%) | 112 (58.3%) | 289 (58.5%) | 1.011 | 0.701 | 1.46 | 0.953 |  |  |  |  |
| Mortality | | 30 (9.9%) | 20 (10.4%) | 50 (10.1%) | 0.949 | 0.522 | 1.723 | 0.862 |  |  |  |  |
| Department (ICU) | | 81 (26.8%) | 56 (29.2%) | 137 (27.7%) | 0.89 | 0.595 | 1.331 | 0.57 |  |  |  |  |
| Malignancy | | 27 (8.9%) | 16 (8.3%) | 43 (8.7%) | 1.08 | 0.566 | 2.062 | 0.816 |  |  |  |  |
| Cardiovascular disease | | 57 (18.9%) | 28 (14.6%) | 85 (17.2%) | 1.363 | 0.832 | 2.232 | 0.218 |  |  |  |  |
| Cerebrovascular disease | | 34 (11.3%) | 24 (12.5%) | 58 (11.7%) | 0.888 | 0.509 | 1.55 | 0.676 |  |  |  |  |
| Autoimmune disease | | 7 (2.3%) | 5 (2.6%) | 12 (2.4%) | 0.887 | 0.278 | 2.837 | 0.84 |  |  |  |  |
| Agranulocytosis | 9 (3%) | | 6 (3.1%) | 15 (3%) | 0.952 | 0.333 | 2.179 | 0.937 |  |  |  |  |
| Chronic renal insufficiency | 19 (6.3%) | | 17 (8.9%) | 36 (7.3%) | 0.691 | 0.35 | 1.365 | 0.285 |  |  |  |  |
| Chronic obstructive  pulmonary disease | 4 (1.3%) | | 3 (1.6%0 | 7 (1.4%) | 0.846 | 0.187 | 3.82 | 0.827 |  |  |  |  |
| Pulmonary infection | 129 (42.7%) | | 80 (41.7%) | 209 (42.3%) | 1.044 | 0.724 | 1.506 | 0.818 |  |  |  |  |
| Urinary tract infection | 30 (9.9%) | | 21 (10.9%) | 51 (10.3%) | 0.898 | 0.498 | 1.619 | 0.721 |  |  |  |  |
| Biliary tract infection | 37 (12.3%) | | 29 (15.1%) | 66 (13.4%) | 0.785 | 0.465 | 1.325 | 0.364 |  |  |  |  |
| Hypertension | 135 (44.7%) | | 95 (49.5%) | 230 (46.6%) | 0.825 | 0.574 | 1.186 | 0.299 |  |  |  |  |
| Diabetes mellitus | 108（35.8%) | | 61 (31.8%) | 169 (34.2%) | 1.196 | 0.814 | 1.756 | 0.362 |  |  |  |  |
| Invasive procedures | 180 (59.6%) | | 136 (70.8%) | 316 (64%) | 0.608 | 0.413 | 0.894 | **0.011** | 0.608 | 0.413 | 0.894 | **0.012** |
| Therapeutic procedure(catheter) | 195 (64.6%) | | 131 (68.2%) | 326 (66%) | 0.849 | 0.578 | 1.247 | 0.403 |  |  |  |  |
| Vascular catheter 1 | 151 (50%) | | 101 (52.6%) | 252 (51%) | 0.901 | 0.627 | 1.294 | 0.572 |  |  |  |  |
| Urinary catheter 2 | 163 (54%) | | 115 (59.9%) | 278 (56.3%) | 0.785 | 0.544 | 1.133 | 0.196 |  |  |  |  |
| Mechanical ventilation 3 | 124 (41.1%) | | 90 (46.9%) | 214 (43.3%) | 0.79 | 0.548 | 1.137 | 0.204 |  |  |  |  |
| 1+2 | 118 (39.1%) | | 84 (43.8%) | 202 (40.9%) | 0.825 | 0.571 | 1.19 | 0.303 |  |  |  |  |
| 1+3 | 101 (33.4%) | | 73 (38%) | 174 (35.2%) | 0.819 | 0.562 | 1.194 | 0.299 |  |  |  |  |
| 2+3 | 120 (39.7%) | | 88 (45.8%) | 208 (42.1%) | 0.779 | 0.541 | 1.123 | 0.181 |  |  |  |  |
| 1+2+3 | 97 (32.1%) | | 71 (37%) | 168 (34%) | 0.806 | 0.552 | 1.179 | 0.266 |  |  |  |  |
| Previous corticosteroid therapy | 12 (4%) | | 5 (2.6%) | 17 (3.4%) | 1.548 | 0.537 | 4.464 | 0.416 |  |  |  |  |
| Previous antibiotic therapy | 73 (24.2%) | | 41 (21.4%) | 114 (23.1%) | 1.174 | 0.761 | 1.812 | 0.469 |  |  |  |  |
| Alcohol Drinking History | 21 (7%) | | 13 (6.8%) | 34 (6.9%) | 1.029 | 0.503 | 2.107 | 0.938 |  |  |  |  |
| Smoking History | 30 (9.9%) | | 17 (8.9%) | 47 (9.5%) | 1.135 | 0.608 | 2.12 | 0.69 |  |  |  |  |

OR: Odds Ratio; Upper and Lower: 95% CI (confidence interval);1+2: Vascular catheter+ Urinary catheter;1+3: Vascular catheter+ Mechanical ventilation;2+3: Urinary catheter+ Mechanical ventilation;1+2+3:Vascular catheter+ Urinary catheter+ Mechanical ventilation.
