# Supplementary material for: Epidemiology, Molecular Characteristics, and Clinical Risk Factors of Klebsiella pneumoniae Bloodstream Infections: A Nine-Year Retrospective Study (2016–2024)
Source: Research Square preprint supplement (doi:10.21203/rs.3.rs-7873537/v1), 2025-11-25
Supplement: Supplementary file 7 [file 426bb32d0091e9b7d89bcb56.docx]

Table S14. Multivariable and Univariate analyses of Risk Factors for K2 and K64 in *Klebsiella pneumoniae* Bloodstream Infection. A p value of less than 0.05 was set as the threshold for significance.

| **Variables** | **K2 (n=55)** | | **K64 (n=399)** | **Total**  **(n=454)** | **Univariate**  **analysis**  **OR** | **Lower** | **Upper** | **P value** | **Multivariate analysis**  **OR** | **Lower** | **Upper** | **P value** |
| --- | --- | --- | --- | --- | --- | --- | --- | --- | --- | --- | --- | --- |
| Agender (male) | | 33 (60%) | 293 (73.4%) | 326 (71.8%) | 1.843 | 1.028 | 3.301 | **0.038** | 1.865 | 1.035 | 3.361 | **0.038** |
| Age≥60 | | 33 (60%) | 206 (51.6%) | 239 (52.6%) | 0.712 | 0.401 | 1.263 | 0.244 |  |  |  |  |
| Mortality | | 4 (7.3%) | 52 (13%) | 56 (12.3%) | 1.911 | 0.663 | 5.507 | 0.223 |  |  |  |  |
| Department (ICU) | | 14 (25.5%) | 121 (30.3%) | 135 (29.7%) | 1.275 | 0.67 | 2.425 | 0.459 |  |  |  |  |
| Malignancy | | 9 (16.4%) | 48 (12%) | 57 (12.6%) | 0.699 | 0.322 | 1.518 | 0.363 |  |  |  |  |
| Cardiovascular disease | | 10 (18.2%) | 81 (20.3%) | 91 (20%) | 1.146 | 0.554 | 2.372 | 0.713 |  |  |  |  |
| Cerebrovascular disease | | 5 (9.1%) | 47 (11.8%) | 52 (11.5%) | 1.335 | 0.507 | 3.517 | 0.557 |  |  |  |  |
| Autoimmune disease | | 0 | 9 (2.3%) | 9 (2%) |  |  |  | 0.261 |  |  |  |  |
| Agranulocytosis | | 2 (3.6%) | 17 (4.3%) | 19 (4.2%) | 1.179 | 0.265 | 5.249 | 0.828 |  |  |  |  |
| Chronic renal insufficiency | | 5 (9.1%) | 37 (9.3%) | 42 (9.3%) | 1.022 | 0.384 | 2.722 | 0.965 |  |  |  |  |
| Chronic obstructive  pulmonary disease | | 0 | 3 (0.8%) | 3 (0.7%) |  |  |  | 0.519 |  |  |  |  |
| Pulmonary infection | | 27 (49.1%) | 191 (47.9%) | 218 (48%) | 0.952 | 0.542 | 1.674 | 0.865 |  |  |  |  |
| Urinary tract infection | | 2 (3.6%) | 46 (11.5%) | 48 (10.6%) | 3.453 | 0.814 | 14.646 | 0.074 |  |  |  |  |
| Biliary tract infection | | 11 (20%) | 64 (16%) | 75 (16.5%) | 0.764 | 0.375 | 1.559 | 0.458 |  |  |  |  |
| Hypertension | | 26 (47.3%) | 184 (46.1%) | 210 (46.3%) | 0.955 | 0.543 | 1.679 | 0.872 |  |  |  |  |
| Diabetes mellitus | | 12 (21.8%) | 122 (30.6%) | 134 (29.5%) | 1.578 | 0.804 | 3.098 | 0.182 |  |  |  |  |
| Invasive procedures | | 28 (50.9%) | 221 (55.4%) | 249 (54.8%) | 1.197 | 0.681 | 2.105 | 0.531 |  |  |  |  |
| Therapeutic procedure(catheter) | | 33 (60%) | 278 (69.7%) | 311 (68.5%) | 1.532 | 0.857 | 2.736 | 0.148 |  |  |  |  |
| Vascular catheter 1 | | 29 (52.7%) | 217 (54.4%) | 246 (54.2%) | 1.069 | 0.608 | 1.88 | 0.817 |  |  |  |  |
| Urinary catheter 2 | | 25 (45.5%) | 227 (56.9%) | 252 (55.5%) | 1.584 | 0.899 | 2.791 | 0.11 |  |  |  |  |
| Mechanical ventilation 3 | | 19 (34.5%) | 156 (39.1%) | 175 (38.5%) | 1.216 | 0.674 | 2.197 | 0.516 |  |  |  |  |
| 1+2 | | 22 (40%) | 135 (33.8%) | 157 (34.6%) | 1.304 | 0.731 | 2.324 | 0.367 |  |  |  |  |
| 1+3 | | 18 (32.7%) | 103 (25.8%) | 121 (26.7%) | 1.398 | 0.763 | 2.563 | 0.277 |  |  |  |  |
| 2+3 | | 18 (32.7%) | 110 (27.6%) | 128 (28.2%) | 1.278 | 0.698 | 2.339 | 0.425 |  |  |  |  |
| 1+2+3 | | 17 (30.9%) | 101 (25.3%) | 118 (26%) | 1.32 | 0.714 | 2.441 | 0.375 |  |  |  |  |
| Previous corticosteroid therapy | | 0 | 24 (6%) | 24 (5.3%) |  |  |  | 0.062 |  |  |  |  |
| Previous antibiotic therapy | | 14 (25.5%) | 129 (32.3%) | 143 (31.5%) | 1.399 | 0.736 | 2.659 | 0.303 |  |  |  |  |
| Alcohol Drinking History | | 5 (9.1%) | 32 (8%) | 37 (8.1%) | 0.872 | 0.325 | 2.341 | 0.786 |  |  |  |  |
| Smoking History | | 6 (10.9%) | 56 (14%) | 62 (13.7%) | 1.333 | 0.546 | 3.258 | 0.527 |  |  |  |  |

OR: Odds Ratio; Upper and Lower: 95% CI (confidence interval);1+2: Vascular catheter+ Urinary catheter;1+3: Vascular catheter+ Mechanical ventilation;2+3: Urinary catheter+ Mechanical ventilation;1+2+3:Vascular catheter+ Urinary catheter+ Mechanical ventilation.
