# Supplementary material for: Epidemiology, Molecular Characteristics, and Clinical Risk Factors of Klebsiella pneumoniae Bloodstream Infections: A Nine-Year Retrospective Study (2016–2024)
Source: Research Square preprint supplement (doi:10.21203/rs.3.rs-7873537/v1), 2025-11-25
Supplement: Supplementary file 8 [file 531c2f94ec2dbe5f8161dfe3.docx]

Table S22. Multivariable and Univariate analyses of Risk Factors for ST65 and ST86 in *Klebsiella pneumoniae* Bloodstream Infection. A p value of less than 0.05 was set as the threshold for significance.

| **Variables** | **ST65 (n=48)** | | **ST86 (n=71)** | **Total**  **(n=119)** | **Univariate**  **analysis OR** | **Lower** | **Upper** | **P value** | **Multivariate analysis**  **OR** | **Lower** | **Upper** | **P value** |
| --- | --- | --- | --- | --- | --- | --- | --- | --- | --- | --- | --- | --- |
| Agender (male) | | 31 (64.6%) | 50 (70.4%) | 81 (68.1%) | 0.766 | 0.351 | 1.672 | 0.503 |  |  |  |  |
| Age≥60 | | 25 (52.1%) | 36 (50.7%) | 61 (51.3%) | 1.057 | 0.508 | 2.199 | 0.883 |  |  |  |  |
| Mortality | | 14 (29.2%) | 9 (12.7%) | 23 (19.3%) | 2.837 | 1.112 | 7.233 | **0.025** | 1.44 | 0.439 | 4.73 | 0.548 |
| Department (ICU) | | 13 (27.1%) | 18 (25.4%) | 31 (26.1%) | 1.094 | 0.476 | 2.511 | 0.833 |  |  |  |  |
| Malignancy | | 12 (25%) | 6 (8.5%) | 18 (15.1%) | 3.611 | 1.25 | 10.436 | **0.013** | 1.714 | 0.488 | 6.026 | 0.401 |
| Cardiovascular disease | | 8 (16.7%) | 13 (18.3%) | 21 (17.6%) | 0.892 | 0.339 | 2.35 | 0.818 |  |  |  |  |
| Cerebrovascular disease | | 11 (22.9%) | 5 (7%) | 16 (13.4%) | 3.924 | 1.266 | 12.163 | **0.013** | 1.714 | 0.488 | 6.026 | 0.409 |
| Autoimmune disease | | 1 (2.1%) | 0 | 1 (0.8%) |  |  |  | 0.222 |  |  |  |  |
| Agranulocytosis | | 2 (4.2%) | 7 (9.9%) | 9 (7.6%) | 0.398 | 0.079 | 2.002 | 0.249 |  |  |  |  |
| Chronic renal insufficiency | | 4 (8.3%) | 8 (11.3%) | 12 (10.1%) | 0.716 | 0.203 | 2.525 | 0.602 |  |  |  |  |
| Chronic obstructive  pulmonary disease | | 1 (2.1%) | 0 | 1 (0.8%) |  |  |  | 0.222 |  |  |  |  |
| Pulmonary infection | | 15 (31.1%) | 29 (40.8%) | 44 (37%) | 0.658 | 0.304 | 1.425 | 0.287 |  |  |  |  |
| Urinary tract infection | | 1 (2.1%) | 10 (14.1%) | 11 (9.2%) | 0.13 | 0.016 | 1.05 | **0.027** | 0.115 | 0.013 | 1.042 | 0.054 |
| Biliary tract infection | | 6 (12.5%) | 10 (14.1%) | 16 (13.4%) | 0.871 | 0.294 | 2.581 | 0.804 |  |  |  |  |
| Hypertension | | 17 (35.4%) | 31 (43.7%) | 48 (40.3%) | 0.708 | 0.333 | 1.505 | 0.368 |  |  |  |  |
| Diabetes mellitus | | 8 (16.7%) | 20 (28.2%) | 28 (23.5%) | 0.51 | 0.204 | 1.278 | 0.147 |  |  |  |  |
| Invasive procedures | | 34 (70.8%) | 34 (47.9%) | 68 (57.1%) | 2.643 | 1.215 | 5.75 | **0.013** | 3.158 | 1.247 | 7.998 | **0.015** |
| Therapeutic procedure(catheter) | | 30 (62.5%) | 42 (59.2%) | 72 (60.5%) | 1.151 | 0.543 | 2.441 | 0.714 |  |  |  |  |
| Vascular catheter 1 | | 22 (45.8%) | 27 (38%) | 49 (41.2%) | 1.379 | 0.656 | 2.899 | 0.396 |  |  |  |  |
| Urinary catheter 2 | | 26 (54.2%) | 35 (49.3%) | 61 (51.3%) | 1.216 | 0.583 | 2.533 | 0.602 |  |  |  |  |
| Mechanical ventilation 3 | | 23 (47.9%) | 24 (33.8%) | 47 (39.5%) | 1.802 | 0.851 | 3.814 | 0.122 |  |  |  |  |
| 1+2 | | 16 (33.3%) | 21 (29.6%) | 37 (31.1%) | 1.19 | 0.542 | 2.616 | 0.664 |  |  |  |  |
| 1+3 | | 4 (8.3%) | 18 (25.4%) | 22 (18.5%) | 0.268 | 0.084 | 0.849 | **0.019** | 0.25 | 0.036 | 1.739 | 0.161 |
| 2+3 | | 8 (16.7%) | 24 (33.8%) | 32 (26.9%) | 0.392 | 0.159 | 0.968 | **0.039** | 0.616 | 0.122 | 3.111 | 0.558 |
| 1+2+3 | | 4 (8.3%) | 18 (25.4%) | 22 (18.5%) | 0.268 | 0.084 | 0.849 | **0.019** | 0.276 | 0.081 | 0.939 | **0.039** |
| Previous corticosteroid therapy | | 1 (2.1%) | 2 (2.8%) | 3 (2.5%) | 0.734 | 0.065 | 8.329 | 0.802 |  |  |  |  |
| Previous antibiotic therapy | | 30 (62.5%) | 23 (32.4%) | 53 (44.5%) | 3.478 | 1.615 | 7.491 | **0.001** | 2.467 | 0.998 | 6.101 | 0.051 |
| Alcohol Drinking History | | 6 (12.5%) | 12 (16.9%) | 18 (15.1%) | 0.702 | 0.244 | 2.021 | 0.511 |  |  |  |  |
| Smoking History | | 6 (12.5%) | 11 (15.5%) | 17 (14.3%) | 0.779 | 0.267 | 2.272 | 0.647 |  |  |  |  |

OR: Odds Ratio; Upper and Lower: 95% CI (confidence interval);1+2: Vascular catheter+ Urinary catheter;1+3: Vascular catheter+ Mechanical ventilation;2+3: Urinary catheter+ Mechanical ventilation;1+2+3:Vascular catheter+ Urinary catheter+ Mechanical ventilation.
