# Supplementary material for: Epidemiology, Molecular Characteristics, and Clinical Risk Factors of Klebsiella pneumoniae Bloodstream Infections: A Nine-Year Retrospective Study (2016–2024)
Source: Research Square preprint supplement (doi:10.21203/rs.3.rs-7873537/v1), 2025-11-25
Supplement: Supplementary file 9 [file 71b429cfd115711af856d957.docx]

Table S3. Multivariable and Univariate analyses of Risk Factors for *rmpA* and *iutA* in *Klebsiella pneumoniae* Bloodstream Infection. A p value of less than 0.05 was set as the threshold for significance.

| **Variables** | ***rmpA* (n=302）** | ***iutA* (n=546）** | **Total**  **(n=848)** | **Univariate**  **analysis**  **OR** | **Lower** | **Upper** | **P value** | **Multivariate analysis**  **OR** | **Lower** | **Upper** | **P value** |
| --- | --- | --- | --- | --- | --- | --- | --- | --- | --- | --- | --- |
| Agender (male) | 220 (72.8%) | 391 (71.6%) | 611 (72.1%) | 1.064 | 0.777 | 1.457 | 0.701 |  |  |  |  |
| Age≥60 | 177 (58.6%) | 304 (55.7%) | 481 (56.7%) | 1.127 | 0.848 | 1.498 | 0.409 |  |  |  |  |
| Mortality | 30 (9.9%) | 61 (11.2%) | 91 (10.7%) | 0.877 | 0.553 | 1.391 | 0.577 |  |  |  |  |
| Department (ICU) | 81 (26.8%) | 147 (26.9%) | 228 (26.9%) | 0.995 | 0.724 | 1.366 | 0.974 |  |  |  |  |
| Malignancy | 27 (8.9%) | 63 (11.5%) | 90 (10.6%) | 0.753 | 0.468 | 1.21 | 0.24 |  |  |  |  |
| Cardiovascular disease | 57 (18.9%) | 98 (17.9%) | 155 (18.3%) | 1.064 | 0.741 | 1.527 | 0.738 |  |  |  |  |
| Cerebrovascular disease | 34 (11.3%) | 63 (11.5%) | 97 (11.4%) | 0.973 | 0.625 | 1.515 | 0.902 |  |  |  |  |
| Autoimmune disease | 7 (2.3%) | 13 (2.4%) | 20 (2.4%) | 0.973 | 0.384 | 2.465 | 0.954 |  |  |  |  |
| Agranulocytosis | 9 (3%) | 21 (3.8%) | 30 (3.5%) | 0.768 | 0.347 | 1.699 | 0.513 |  |  |  |  |
| Chronic renal insufficiency | 19 (6.3%) | 44 (8.1%) | 63 (7.4%) | 0.766 | 0.439 | 1.338 | 0.347 |  |  |  |  |
| Chronic obstructive  pulmonary disease | 4 (1.3%) | 4 (0.7%) | 8 (0.9%) | 1.819 | 0.452 | 7.325 | 0.393 |  |  |  |  |
| Pulmonary infection | 129 (42.7%) | 235 (43%) | 364 (42.9%) | 0.987 | 0.743 | 1.311 | 0.927 |  |  |  |  |
| Urinary tract infection | 30 (9.9%) | 53 (9.7%) | 83 (9.8%) | 1.026 | 0.64 | 1.644 | 0.915 |  |  |  |  |
| Biliary tract infection | 37 (12.3%) | 96 (17.6%) | 133 (15.7%) | 0.654 | 0.435 | 0.985 | **0.041** | 0.654 | 0.435 | 0.985 | **0.042** |
| Hypertension | 135 (44.7%) | 256 (46.9%) | 391 (46.1%) | 0.916 | 0.69 | 1.214 | 0.541 |  |  |  |  |
| Diabetes mellitus | 108（35.8%) | 181 (33.2%) | 289 (34.1%) | 1.123 | 0.836 | 1.508 | 0.442 |  |  |  |  |
| Invasive procedures | 180 (59.6%) | 305 (55.9%) | 485 (57.2%) | 1.166 | 0.876 | 1.551 | 0.292 |  |  |  |  |
| Therapeutic procedure(catheter) | 195 (64.6%) | 356 (65.2%) | 551 (65%) | 0.973 | 0.725 | 1.305 | 0.853 |  |  |  |  |
| Vascular catheter 1 | 151 (50%) | 287 (52.6%) | 438 (51.7%) | 0.902 | 0.681 | 1.196 | 0.474 |  |  |  |  |
| Urinary catheter 2 | 163 (54%) | 305 (55.9%) | 468 (55.2%) | 0.927 | 0.699 | 1.229 | 0.597 |  |  |  |  |
| Mechanical ventilation 3 | 124 (41.1%) | 209 (38.3%) | 333 (39.3%) | 1.123 | 0.843 | 1.497 | 0.427 |  |  |  |  |
| 1+2 | 118（39.1%) | 237 (43.4%) | 355 (41.9%) | 0.836 | 0.628 | 1.114 | 0.221 |  |  |  |  |
| 1+3 | 101 (33.4%) | 188 (34.4%) | 289 (34.1%) | 0.957 | 0.711 | 1.288 | 0.771 |  |  |  |  |
| 2+3 | 120 (39.7%) | 204 (37.4%) | 324 (38.2%) | 1.105 | 0.828 | 1.475 | 0.496 |  |  |  |  |
| 1+2+3 | 97 (32.1%) | 183 (33.5%) | 280 (33%) | 0.939 | 0.695 | 1.267 | 0.679 |  |  |  |  |
| Previous corticosteroid therapy | 12 (4%) | 25 (4.6%) | 37 (4.4%) | 0.862 | 0.427 | 1.742 | 0.679 |  |  |  |  |
| Previous antibiotic therapy | 73 (24.2%) | 166 (30.4%) | 239 (28.2%) | 0.71 | 0.53 | 1.005 | 0.053 |  |  |  |  |
| Alcohol Drinking History | 21 (7%) | 49 (9%) | 70 (8.3%) | 0.758 | 0.445 | 1.29 | 0.306 |  |  |  |  |
| Smoking History | 30 (9.9%) | 71 (13%) | 101 (11.9%) | 0.738 | 0.47 | 1.16 | 0.186 |  |  |  |  |

OR: Odds Ratio; Upper and Lower: 95% CI (confidence interval);1+2: Vascular catheter+ Urinary catheter;1+3: Vascular catheter+ Mechanical ventilation;2+3: Urinary catheter+ Mechanical ventilation;1+2+3:Vascular catheter+ Urinary catheter+ Mechanical ventilation.
