# Supplementary material for: Epidemiology, Molecular Characteristics, and Clinical Risk Factors of Klebsiella pneumoniae Bloodstream Infections: A Nine-Year Retrospective Study (2016–2024)
Source: Research Square preprint supplement (doi:10.21203/rs.3.rs-7873537/v1), 2025-11-25
Supplement: Supplementary file 10 [file 7eab1545cedc421c10528cf9.docx]

Table S23. Multivariable and Univariate analyses of Risk Factors for ST86 and non-ST86 in *Klebsiella pneumoniae* Bloodstream Infection. A p value of less than 0.05 was set as the threshold for significance.

| **Variables** | **ST86 (n=71)** | | **Non-ST86 (n=760)** | **Total**  **(n=831)** | **Univariate**  **analysis OR** | **Lower** | **Upper** | **P value** | **Multivariate analysis**  **OR** | **Lower** | **Upper** | **P value** |
| --- | --- | --- | --- | --- | --- | --- | --- | --- | --- | --- | --- | --- |
| Agender (male) | | 50 (70.4%) | 535 (70.4%) | 585 (70.4%) | 1.001 | 0.588 | 1.706 | 0.996 |  |  |  |  |
| Age≥60 | | 36 (50.7%) | 420 (55.3%) | 456 (54.9%) | 0.833 | 0.512 | 1.355 | 0.46 |  |  |  |  |
| Mortality | | 9 (12.7%) | 83 (10.9%) | 92 (11.1%) | 1.184 | 0.568 | 2.47 | 0.652 |  |  |  |  |
| Department (ICU) | | 18 (25.4%) | 194 (25.5%) | 212 (25.5%) | 0.991 | 0.567 | 1.733 | 0.974 |  |  |  |  |
| Malignancy | | 6 (8.5%) | 85 (11.2%) | 91 (11%) | 0.733 | 0.308 | 1.743 | 0.481 |  |  |  |  |
| Cardiovascular disease | | 13 (18.3%) | 138 (18.2%) | 151 (18.2%) | 1.01 | 0.539 | 1.895 | 0.975 |  |  |  |  |
| Cerebrovascular disease | | 5 (7%) | 87 (11.4%) | 92（11.1%) | 0.586 | 0.23 | 1.494 | 0.258 |  |  |  |  |
| Autoimmune disease | | 0 | 15 (2%) | 15 (1.8%) |  |  |  | 0.232 |  |  |  |  |
| Agranulocytosis | | 7 (9.9%) | 29 (3.8%) | 36 (4.3%) | 2.757 | 1.162 | 6.541 | **0.017** | 2.81 | 1.153 | 6.853 | **0.023** |
| Chronic renal insufficiency | | 8 (11.3%) | 69 (9.1%) | 77 (9.3%) | 1.272 | 0.585 | 2.763 | 0.543 |  |  |  |  |
| Chronic obstructive  pulmonary disease | | 0 | 6 (0.8%) | 6 (0.7%) |  |  |  | 0.452 |  |  |  |  |
| Pulmonary infection | | 29 (40.8%) | 320 (42.1%) | 349 (42%) | 0.949 | 0.579 | 1.557 | 0.837 |  |  |  |  |
| Urinary tract infection | | 10 (14.1%) | 72 (9.5%) | 82 (9.9%) | 1.566 | 0.769 | 3.191 | 0.213 |  |  |  |  |
| Biliary tract infection | | 10 (14.1%) | 130 (17.1%) | 140 (16.8%) | 0.794 | 0.397 | 1.592 | 0.515 |  |  |  |  |
| Hypertension | | 31 (43.7%) | 349（45.95) | 380 (45.7%) | 0.913 | 0.559 | 1.49 | 0.715 |  |  |  |  |
| Diabetes mellitus | | 20 (28.2%) | 243 (32%) | 263 (31.6%) | 0.834 | 0.487 | 1.43 | 0.51 |  |  |  |  |
| Invasive procedures | | 34 (47.9%) | 463 (60.9%) | 497 (59.8%) | 0.589 | 0.362 | 0.96 | **0.032** | 0.668 | 0.395 | 1.13 | 0.133 |
| Therapeutic procedure(catheter) | | 42 (59.2%) | 505 (66.4%) | 547 (65.8%) | 0.731 | 0.445 | 1.202 | 0.215 |  |  |  |  |
| Vascular catheter 1 | | 27 (38%) | 401 (52.8%) | 428 (51.5%) | 0.549 | 0.333 | 0.906 | **0.018** | 0.657 | 0.287 | 1.504 | 0.32 |
| Urinary catheter 2 | | 35 (49.3%) | 427 (56.2%) | 462 (55.6%) | 0.758 | 0.466 | 1.234 | 0.264 |  |  |  |  |
| Mechanical ventilation 3 | | 24 (33.8%) | 292 (38.4%) | 316 (38%) | 0.818 | 0.49 | 1.367 | 0.443 |  |  |  |  |
| 1+2 | | 21 (29.6%) | 325 (42.8%) | 346 (41.6%) | 0.562 | 0.331 | 0.955 | **0.031** | 0.937 | 0.382 | 2.303 | 0.888 |
| 1+3 | | 18 (25.4%) | 255 (33.6%) | 273 (32.9%) | 0.673 | 0.386 | 1.172 | 0.159 |  |  |  |  |
| 2+3 | | 24 (33.8%) | 284 (37.4%) | 308 (37.1%) | 0.856 | 0.512 | 1.43 | 0.552 |  |  |  |  |
| 1+2+3 | | 18 (25.4%) | 247（32.5%0 | 265 (31.9%) | 0.705 | 0.405 | 1.23 | 0.216 |  |  |  |  |
| Previous corticosteroid therapy | | 2 (2.8%) | 38 (5%) | 40 (4.8%) | 0.551 | 0.13 | 2.332 | 0.411 |  |  |  |  |
| Previous antibiotic therapy | | 23 (32.4%) | 204 (26.8%) | 227 (27.3%) | 1.306 | 0.775 | 2.202 | 0.315 |  |  |  |  |
| Alcohol Drinking History | | 12 (16.9%) | 53 (7%) | 65 (7.8%) | 2.713 | 1.374 | 5.358 | **0.003** | 2.81 | 1.401 | 5.636 | **0.004** |
| Smoking History | | 11 (15.5%) | 85 (11.2%) | 96 (11.6%) | 1.456 | 0.737 | 2.877 | 0.277 |  |  |  |  |

OR: Odds Ratio; Upper and Lower: 95% CI (confidence interval);1+2: Vascular catheter+ Urinary catheter;1+3: Vascular catheter+ Mechanical ventilation;2+3: Urinary catheter+ Mechanical ventilation;1+2+3:Vascular catheter+ Urinary catheter+ Mechanical ventilation.
