# Supplementary material for: Epidemiology, Molecular Characteristics, and Clinical Risk Factors of Klebsiella pneumoniae Bloodstream Infections: A Nine-Year Retrospective Study (2016–2024)
Source: Research Square preprint supplement (doi:10.21203/rs.3.rs-7873537/v1), 2025-11-25
Supplement: Supplementary file 11 [file 82623e3fa97c728aaa355021.docx]

Table S17. Multivariable and Univariate analyses of Risk Factors for ST11 and ST65 in *Klebsiella pneumoniae* Bloodstream Infection. A p value of less than 0.05 was set as the threshold for significance.

| **Variables** | **ST11 (n=187)** | | **ST65 (n=48)** | **Total**  **(n=235)** | **Univariate**  **analysis OR** | **Lower** | **Upper** | **P value** | **Multivariate analysis**  **OR** | **Lower** | **Upper** | **P value** |
| --- | --- | --- | --- | --- | --- | --- | --- | --- | --- | --- | --- | --- |
| Agender (male) | | 133 (71.1%) | 31 (64.6%) | 164 (69.8%) | 1.351 | 0.691 | 2.641 | 0.379 |  |  |  |  |
| Age≥60 | | 110 (58.8%) | 25 (52.1%) | 135 (57.4%) | 1.314 | 0.695 | 2.485 | 0.399 |  |  |  |  |
| Mortality | | 58 (31%) | 14 (29.2%) | 72 (30.6%) | 1.092 | 0.545 | 2.188 | 0.804 |  |  |  |  |
| Department (ICU) | | 80 (42.8%) | 13 (27.1%) | 93 (39.6%) | 2.013 | 1 | 4.051 | **0.047** | 1.064 | 0.455 | 2.491 | 0.886 |
| Malignancy | | 29 (15.5%) | 12 (25%) | 41 (17.4%) | 0.551 | 0.256 | 1.182 | 0.122 |  |  |  |  |
| Cardiovascular disease | | 47 (25.1%) | 8 (16.7%) | 55 (23.4%) | 1.679 | 0.733 | 3.841 | 0.216 |  |  |  |  |
| Cerebrovascular disease | | 32 (17.1%) | 11 (22.9%) | 43 (18.3%) | 0.694 | 0.32 | 1.505 | 0.354 |  |  |  |  |
| Autoimmune disease | | 9 (4.8%) | 1 (2.1%) | 10 (4.3%) | 2.376 | 0.294 | 19.229 | 0.403 |  |  |  |  |
| Agranulocytosis | | 6 (3.2%) | 2 (4.2%) | 8 (3.4%) | 0.762 | 0.149 | 3.902 | 0.744 |  |  |  |  |
| Chronic renal insufficiency | | 7 (3.7%) | 4 (8.3%) | 11 (4.7%) | 0.428 | 0.12 | 1.526 | 0.179 |  |  |  |  |
| Chronic obstructive  pulmonary disease | | 3 (1.6%) | 1 (2.1%) | 4 (1.7%) | 0.766 | 0.078 | 7.535 | 0.819 |  |  |  |  |
| Pulmonary infection | | 108 (57.8%) | 15 (31.3%) | 123 (52.3%) | 3.008 | 1.53 | 5.912 | **0.001** | 2.076 | 0.967 | 4.46 | 0.061 |
| Urinary tract infection | | 27 (14.4%) | 1 (2.1%) | 28 (11.9%) | 7.931 | 1.05 | 59.923 | **0.018** | 6.254 | 0.785 | 49.825 | 0.083 |
| Biliary tract infection | | 36 (19.3%) | 6 (12.5%) | 42 (17.9%) | 1.669 | 0.659 | 4.227 | 0.276 |  |  |  |  |
| Hypertension | | 101 (54%) | 17 (35.4%) | 118 (50.2%) | 2.142 | 1.109 | 4.134 | **0.022** | 1.79 | 0.871 | 3.681 | 0.113 |
| Diabetes mellitus | | 59 (31.6%) | 8 (16.7%) | 67 (28.5%) | 2.305 | 1.016 | 5.229 | **0.042** | 1.94 | 0.803 | 4.689 | 0.141 |
| Invasive procedures | | 147 (78.6%) | 34 (70.8%) | 181 (77%) | 1.513 | 0.741 | 3.09 | 0.253 |  |  |  |  |
| Therapeutic procedure(catheter) | | 142 (75.9%) | 30 (62.5%) | 172 (73.2%) | 1.893 | 0.965 | 3.714 | 0.061 |  |  |  |  |
| Vascular catheter 1 | | 117 (62.6%) | 22 (45.8%) | 139 (59.1%) | 1.975 | 1.041 | 3.748 | **0.035** | 4.233 | 1.534 | 11.682 | **0.005** |
| Urinary catheter 2 | | 126 (67.4%) | 26 (54.2%) | 152 (64.7%) | 1.748 | 0.917 | 3.331 | 0.088 |  |  |  |  |
| Mechanical ventilation 3 | | 98 (52.4%) | 23 (47.9%) | 121 (51.5%) | 1.197 | 0.634 | 2.258 | 0.579 |  |  |  |  |
| 1+2 | | 29 (15.5%) | 16 (33.3%) | 45 (19.1%) | 0.367 | 0.179 | 0.753 | **0.005** | 0.144 | 0.049 | 0.417 | **＜0.001** |
| 1+3 | | 26 (13.9%) | 4 (8.3%) | 30 (12.8%) | 1.776 | 0.589 | 5.359 | 0.302 |  |  |  |  |
| 2+3 | | 31 (16.6%) | 8 (16.7%) | 39 (16.6%) | 0.994 | 0.424 | 2.328 | 0.988 |  |  |  |  |
| 1+2+3 | | 24 (12.8%) | 4 (8.3%) | 28 (11.9%) | 1.62 | 0.534 | 4.913 | 0.391 |  |  |  |  |
| Previous corticosteroid therapy | | 6 (3.2%) | 1 (2.1%) | 7 (3%) | 1.558 | 0.183 | 13.258 | 0.682 |  |  |  |  |
| Previous antibiotic therapy | | 107 (57.2%) | 30 (62.5%) | 137 (58.3%) | 0.803 | 0.418 | 1.541 | 0.508 |  |  |  |  |
| Alcohol Drinking History | | 18 (9.6%) | 6 (12.5%) | 24 (10.2%) | 0.746 | 0.279 | 1.994 | 0.557 |  |  |  |  |
| Smoking History | | 32 (17.1%) | 6 (12.5%) | 38 (16.2%) | 1.445 | 0.567 | 3.686 | 0.439 |  |  |  |  |

OR: Odds Ratio; Upper and Lower: 95% CI (confidence interval) ;1+2: Vascular catheter+ Urinary catheter;1+3: Vascular catheter+ Mechanical ventilation;2+3: Urinary catheter+ Mechanical ventilation;1+2+3；Vascular catheter+ Urinary catheter+ Mechanical ventilation.
