# Supplementary material for: Epidemiology, Molecular Characteristics, and Clinical Risk Factors of Klebsiella pneumoniae Bloodstream Infections: A Nine-Year Retrospective Study (2016–2024)
Source: Research Square preprint supplement (doi:10.21203/rs.3.rs-7873537/v1), 2025-11-25
Supplement: Supplementary file 12 [file 9d92d999e69ef7cf53ec0733.docx]

Table S21. Multivariable and Univariate analyses of Risk Factors for ST23 and non-ST86 in *Klebsiella pneumoniae* Bloodstream Infection. A p value of less than 0.05 was set as the threshold for significance.

| **Variables** | **ST23 (n=86)** | | **ST86 (n=71)** | **Total**  **(n=157)** | **Univariate**  **analysis OR** | **Lower** | **Upper** | **P value** | **Multivariate analysis**  **OR** | **Lower** | **Upper** | **P value** |
| --- | --- | --- | --- | --- | --- | --- | --- | --- | --- | --- | --- | --- |
| Agender (male) | | 69 (80.2%) | 50 (70.4%) | 119 (75.8%) | 1.705 | 0.817 | 3.558 | 0.153 |  |  |  |  |
| Age≥60 | | 42 (48.8%) | 36 (50.7%) | 78 (49.7%) | 0.928 | 0.495 | 1.74 | 0.816 |  |  |  |  |
| Mortality | | 11 (12.8%) | 9 (12.7%) | 20 (12.7%) | 1.01 | 0.394 | 2.594 | 0.983 |  |  |  |  |
| Department (ICU) | | 20 (23.3%) | 18 (25.4%) | 38 (24.2%) | 0.892 | 0.429 | 1.856 | 0.76 |  |  |  |  |
| Malignancy | | 4 (4.7%) | 6 (8.5%) | 10 (6.4%) | 0.528 | 0.143 | 1.951 | 0.332 |  |  |  |  |
| Cardiovascular disease | | 15 (17.4%) | 13 (18.3%) | 28 (17.8%) | 0.943 | 0.415 | 2.14 | 0.888 |  |  |  |  |
| Cerebrovascular disease | | 11 (12.8%) | 5 (7%) | 16 (10.2%) | 1.936 | 0.64 | 5.861 | 0.236 |  |  |  |  |
| Autoimmune disease | | 1 (1.5%) | 0 | 1 (0.6%) |  |  |  | 0.362 |  |  |  |  |
| Agranulocytosis | | 1 (1.2%) | 7 (9.9%) | 8 (5.1%) | 0.108 | 0.013 | 0.896 | **0.014** | 0.083 | 0.01 | 0.717 | **0.024** |
| Chronic renal insufficiency | | 10 (11.6%) | 8 (11.3%) | 18 (11.5%) | 1.036 | 0.386 | 2.783 | 0.944 |  |  |  |  |
| Chronic obstructive  pulmonary disease | | 2 (2.3%) | 0 | 2 (1.3%) |  |  |  | 0.196 |  |  |  |  |
| Pulmonary infection | | 37 (43%) | 29 (40.8%) | 66 (42%) | 1.094 | 0.578 | 2.068 | 0.783 |  |  |  |  |
| Urinary tract infection | | 7 (8.1%) | 10 (14.1%) | 17 (10.8%) | 0.541 | 0.195 | 1.502 | 0.233 |  |  |  |  |
| Biliary tract infection | | 4 (4.7%) | 10 (14.1%) | 14 (8.9%) | 0.298 | 0.089 | 0.994 | **0.039** | 0.225 | 0.064 | 0.795 | **0.021** |
| Hypertension | | 43 (50%) | 31 (43.7%) | 74 (47.1%) | 1.29 | 0.686 | 2.426 | 0.428 |  |  |  |  |
| Diabetes mellitus | | 26 (30.2%) | 20 (28.2%) | 46 (29.3%) | 1.105 | 0.553 | 2.208 | 0.777 |  |  |  |  |
| Invasive procedures | | 59（68.6%) | 34 (47.9%) | 93 (59.2%) | 2.378 | 1.24 | 4.561 | **0.009** | 2.243 | 1.102 | 4.569 | **0.026** |
| Therapeutic procedure(catheter) | | 46 (53.5%) | 42 (59.2%) | 88 (56.1%) | 0.794 | 0.421 | 1.499 | 0.476 |  |  |  |  |
| Vascular catheter 1 | | 35 (40.7%) | 27 (38%) | 62 (39.5%) | 1.118 | 0.587 | 2.129 | 0.733 |  |  |  |  |
| Urinary catheter 2 | | 37 (43%) | 35 (49.3%) | 72 (45.9%) | 0.777 | 0.413 | 1.46 | 0.432 |  |  |  |  |
| Mechanical ventilation 3 | | 25 (29.1%) | 24 (33.8%) | 49 (31.2%) | 0.803 | 0.408 | 1.58 | 0.524 |  |  |  |  |
| 1+2 | | 21 (24.4%) | 21 (29.6%) | 42 (26.8%) | 0.769 | 0.379 | 1.562 | 0.467 |  |  |  |  |
| 1+3 | | 16 (18.6%) | 18 (25.4%) | 34 (21.7%) | 0.673 | 0.314 | 1.442 | 0.307 |  |  |  |  |
| 2+3 | | 20 (23.3%) | 24 (33.8%) | 44 (28%) | 0.593 | 0.294 | 1.197 | 0.143 |  |  |  |  |
| 1+2+3 | | 15 (17.4%) | 18 (25.4%) | 33 (21%) | 0.622 | 0.287 | 1.346 | 0.226 |  |  |  |  |
| Previous corticosteroid therapy | | 0 | 2 (2.8%) | 2 (1.3%) |  |  |  | 0.117 |  |  |  |  |
| Previous antibiotic therapy | | 10 (11.6%) | 23 (32.4%) | 33 (21%) | 0.275 | 0.12 | 0.627 | **0.001** | 0.204 | 0.086 | 0.486 | **＜0.001** |
| Alcohol Drinking History | | 7 (8.1%) | 12 (16.9%) | 19 (12.1%) | 0.436 | 0.162 | 1.174 | 0.094 |  |  |  |  |
| Smoking History | | 7 (8.1%) | 11 (15.5%) | 18 (11.5%) | 0.483 | 0.177 | 1.321 | 0.15 |  |  |  |  |

OR: Odds Ratio; Upper and Lower: 95% CI (confidence interval);1+2: Vascular catheter+ Urinary catheter;1+3: Vascular catheter+ Mechanical ventilation;2+3: Urinary catheter+ Mechanical ventilation;1+2+3:Vascular catheter+ Urinary catheter+ Mechanical ventilation.
