# Supplementary material for: Epidemiology, Molecular Characteristics, and Clinical Risk Factors of Klebsiella pneumoniae Bloodstream Infections: A Nine-Year Retrospective Study (2016–2024)
Source: Research Square preprint supplement (doi:10.21203/rs.3.rs-7873537/v1), 2025-11-25
Supplement: Supplementary file 13 [file afd3cc990b4deb5dee03fefb.docx]

Table S12. Multivariable and Univariate analyses of Risk Factors for K1 and K47 in *Klebsiella pneumoniae* Bloodstream Infection. A p value of less than 0.05 was set as the threshold for significance.

| **Variables** | **K1 (n=82)** | | **K47 (n=68)** | **Total**  **(n=150)** | **Univariate**  **analysis OR** | **Lower** | **Upper** | **P value** | **Multivariate analysis**  **OR** | **Lower** | **Upper** | **P value** |
| --- | --- | --- | --- | --- | --- | --- | --- | --- | --- | --- | --- | --- |
| Agender (male) | | 59 (72%) | 54 (79.4%) | 113 (75.3%) | 0.665 | 0.311 | 1.422 | 0.291 |  |  |  |  |
| Age≥60 | | 45 (54.9%) | 45 (66.2%) | 90 (60%) | 0.622 | 0.32 | 1.208 | 0.16 |  |  |  |  |
| Mortality | | 8 (9.8%) | 7 (10.3%) | 15 (10%) | 0.942 | 0.323 | 2.745 | 0.913 |  |  |  |  |
| Department (ICU) | | 23 (28%) | 20 (29.4%) | 43 (28.7%) | 0.936 | 0.46 | 1.903 | 0.854 |  |  |  |  |
| Malignancy | | 5 (6.1%) | 18 (26.5%) | 23 (15.3%) | 0.18 | 0.063 | 0.517 | **＜0.001** | 0.156 | 0.049 | 0.499 | **0.002** |
| Cardiovascular disease | | 11 (13.4%) | 14 (20.6%) | 25 (16.7%) | 0.598 | 0.252 | 1.42 | 0.241 |  |  |  |  |
| Cerebrovascular disease | | 13 (15.9%) | 10 (14.7%) | 23 (15.3%) | 1.093 | 0.446 | 2.675 | 0.846 |  |  |  |  |
| Autoimmune disease | | 1 (1.2%) | 3 (4.4%) | 4 (2.7%) | 0.267 | 0.027 | 2.632 | 0.227 |  |  |  |  |
| Agranulocytosis | | 2 (2.4%) | 1 (1.5%) | 3 (2%) | 1.675 | 0.149 | 18.88 | 0.673 |  |  |  |  |
| Chronic renal insufficiency | | 13（15.9%) | 9 (13.2%) | 22 (14.7%) | 1.235 | 0.493 | 3.094 | 0.652 |  |  |  |  |
| Chronic obstructive  pulmonary disease | | 1 (1.2%) | 0 | 1 (0.7%) |  |  |  | 0.361 |  |  |  |  |
| Pulmonary infection | | 33 (40.2%) | 28 (41.2%) | 61 (40.7%) | 0.962 | 0.5 | 1.851 | 0.908 |  |  |  |  |
| Urinary tract infection | | 3 (3.7%) | 5 (7.4%) | 8 (5.3%) | 0.478 | 0.11 | 2.079 | 0.316 |  |  |  |  |
| Biliary tract infection | | 14 (17.1%) | 14 (20.6%) | 28 (18.7%) | 0.794 | 0.349 | 1.807 | 0.582 |  |  |  |  |
| Hypertension | | 39 (47.6%) | 39 (57.4%) | 78 (52%) | 0.674 | 0.353 | 1.288 | 0.232 |  |  |  |  |
| Diabetes mellitus | | 25 (30.5%) | 30 (44.1%) | 55 (367%) | 0.556 | 0.284 | 1.087 | 0.085 |  |  |  |  |
| Invasive procedures | | 50 (61%) | 42 (61.8%) | 92 (61.3%) | 0.967 | 0.5 | 1.872 | 0.921 |  |  |  |  |
| Therapeutic procedure(catheter) | | 42 (51.2%) | 48 (70.6%) | 90 (60%) | 0.438 | 0.222 | 0.862 | **0.016** | 1.785 | 0.383 | 8.316 | 0.461 |
| Vascular catheter 1 | | 30 (36.6%) | 35（51.5%) | 65 (43.3%) | 0.544 | 0.283 | 1.046 | 0.067 |  |  |  |  |
| Urinary catheter 2 | | 36 (43.9%) | 45 (66.2%) | 81 (54%) | 0.4 | 0.206 | 0.778 | **0.006** | 0.216 | 0.042 | 1.121 | 0.068 |
| Mechanical ventilation 3 | | 30 (36.6%) | 20 (29.4%) | 50 (33.3%) | 1.385 | 0.696 | 2.756 | 0.354 |  |  |  |  |
| 1+2 | | 24 (29.3%) | 32 (47.1%) | 56 (37.2%) | 0.466 | 0.237 | 0.913 | **0.025** | 0.969 | 0.361 | 2.6 | 0.951 |
| 1+3 | | 18 (22%) | 19 (27.9%) | 37 (24.7%) | 0.725 | 0.345 | 1.527 | 0.397 |  |  | . |  |
| 2+3 | | 22 (26.8%) | 20 (29.4%) | 42 (28%) | 0.88 | 0.431 | 1.798 | 0.726 |  |  |  |  |
| 1+2+3 | | 16 (19.5%) | 19 (27.9%) | 35 (23.3%) | 0.625 | 0.292 | 1.338 | 0.224 |  |  |  |  |
| Previous corticosteroid therapy | | 1 (1.2%) | 4 (5.9%) | 5 (3.3%) | 0.198 | 0.022 | 1.811 | 0.113 |  |  |  |  |
| Previous antibiotic therapy | | 13 (15.9%) | 21 (30.9%) | 34 (22.7%) | 0.422 | 0.192 | 0.924 | **0.029** | 0.593 | 0.248 | 1.417 | 0.24 |
| Alcohol Drinking History | | 6 (7.3%) | 4 (5.9%) | 10 (6.7%) | 1.263 | 0.341 | 4.673 | 0.726 |  |  |  |  |
| Smoking History | | 6 (7.3%) | 6 (8.8%) | 12 (8%) | 0.816 | 0.251 | 2.656 | 0.735 |  |  |  |  |

OR: Odds Ratio; Upper and Lower: 95% CI (confidence interval);1+2: Vascular catheter+ Urinary catheter;1+3: Vascular catheter+ Mechanical ventilation;2+3: Urinary catheter+ Mechanical ventilation;1+2+3:Vascular catheter+ Urinary catheter+ Mechanical ventilation.
