# Supplementary material for: Epidemiology, Molecular Characteristics, and Clinical Risk Factors of Klebsiella pneumoniae Bloodstream Infections: A Nine-Year Retrospective Study (2016–2024)
Source: Research Square preprint supplement (doi:10.21203/rs.3.rs-7873537/v1), 2025-11-25
Supplement: Supplementary file 14 [file b3d4d9e8e7a2b1b5fd0bac86.docx]

Table S6. Multivariable and Univariate analyses of Risk Factors for *rmpA2* and *iutA* in *Klebsiella pneumoniae* Bloodstream Infection. A p value of less than 0.05 was set as the threshold for significance.

| **Variables** | ***rmpA2* (n=192）** | | ***iutA* (n=546）** | **Total**  **(n=738)** | **Univariate**  **analysis**  **OR** | **Lower** | **Upper** | **P value** | **Multivariate analysis**  **OR** | **Lower** | **Upper** | **P value** |
| --- | --- | --- | --- | --- | --- | --- | --- | --- | --- | --- | --- | --- |
| Agender (male) | | 146 (76%) | 391 (71.6%) | 537 (72.8%) | 1.258 | 0.86 | 1.84 | 0.236 |  |  |  |  |
| Age≥60 | | 112 (58.3%) | 304 (55.7%) | 416 (56.4%) | 1.114 | 0.799 | 1.555 | 0.523 |  |  |  |  |
| Mortality | | 20 (10.4%) | 61 (11.2%) | 81 (11%) | 0.925 | 0.542 | 1.577 | 0.773 |  |  |  |  |
| Department (ICU) | | 56 (29.2%) | 147（26.9%) | 203 (27.5%) | 1.118 | 0.777 | 1.609 | 0.549 |  |  |  |  |
| Malignancy | | 16 (8.3%) | 63 (11.5%) | 79 (10.7%) | 0.697 | 0.392 | 1.239 | 0.217 |  |  |  |  |
| Cardiovascular disease | | 28 (14.6%) | 98 (17.9%) | 126 (17.1%) | 0.78 | 0.494 | 1.232 | 0.286 |  |  |  |  |
| Cerebrovascular disease | | 24 (12.5%) | 63 (11.5%) | 87 (11.8%) | 1.095 | 0.663 | 1.809 | 0.722 |  |  |  |  |
| Autoimmune disease | | 5 (2.6%) | 13 (2.4%) | 18 (2.4%) | 1.096 | 0.386 | 3.116 | 0.863 |  |  |  |  |
| Agranulocytosis | | 6 (3.1%) | 21 (3.8%) | 27 (3.7%) | 0.806 | 0.321 | 2.029 | 0.647 |  |  |  |  |
| Chronic renal insufficiency | | 17 (8.9%) | 44 (8.1%) | 61 (8.3%) | 1.108 | 0.617 | 1.991 | 0.731 |  |  |  |  |
| Chronic obstructive  pulmonary disease | | 3 (1.6%) | 4 (0.7%) | 7 (0.9%) | 2.151 | 0.477 | 9.698 | 0.308 |  |  |  |  |
| Pulmonary infection | | 80 (41.7%) | 235 (43%) | 315 (42.7%) | 0.945 | 0.677 | 1.319 | 0.741 |  |  |  |  |
| Urinary tract infection | | 21 (10.9%) | 53 (9.7%) | 74 (10%) | 1.142 | 0.669 | 1.949 | 0.625 |  |  |  |  |
| Biliary tract infection | | 29 (15.1%) | 96 (17.6%) | 125 (16.9%) | 0.834 | 0.531 | 1.311 | 0.431 |  |  |  |  |
| Hypertension | | 95 (49.5%) | 256 (46.9%) | 351 (47.6%) | 1.109 | 0.798 | 1.542 | 0.536 |  |  |  |  |
| Diabetes mellitus | | 61 (31.8%) | 181 (33.2%) | 242 (32.8%) | 0.939 | 0.66 | 1.335 | 0.726 |  |  |  |  |
| Invasive procedures | | 136 (70.8%) | 305（55.9%0 | 441 (59.8%) | 1.919 | 1.347 | 2.734 | **＜0.001** | 1.897 | 1.3 | 2.77 | **0.001** |
| Therapeutic procedure(catheter) | | 131 (68.2%) | 356 (65.2%) | 487 (66%) | 1.146 | 0.807 | 1.628 | 0.446 |  |  |  |  |
| Vascular catheter 1 | | 101 (52.6%) | 287 (52.6%) | 388 (52.6%) | 1.002 | 0.721 | 1.392 | 0.992 |  |  |  |  |
| Urinary catheter 2 | | 115 (59.9%) | 302 (55.9%) | 420 (56.9%) | 1.18 | 0.845 | 1.649 | 0.331 |  |  |  |  |
| Mechanical ventilation 3 | | 90 (46.9%) | 209 (38.3%) | 299 (40.5%) | 1.423 | 1.021 | 1.983 | **0.037** | 1.198 | 0.225 | 6.382 | 0.832 |
| 1+2 | | 84 (43.8%) | 237 (43.4%) | 321 (43.5%) | 1.014 | 0.728 | 1.413 | 0.934 |  |  |  |  |
| 1+3 | | 73 (38%) | 188 (34.4%) | 261 (35.4%) | 1.168 | 0.831 | 1.642 | 0.371 |  |  |  |  |
| 2+3 | | 88 (45.8%) | 204 (37.4%) | 292 (39.6%) | 1.419 | 1.017 | 1.978 | **0.039** | 1.065 | 0.198 | 5.711 | 0.942 |
| 1+2+3 | | 71 (37%) | 183 (33.5%) | 254 (34.4%) | 1.164 | 0.826 | 1.640 | 0.385 |  |  |  |  |
| Previous corticosteroid therapy | | 5 (2.6%) | 25 (4.6%) | 30 (4.1%) | 0.557 | 0.21 | 1.477 | 0.233 |  |  |  |  |
| Previous antibiotic therapy | | 41 (21.4%) | 166 (30.4%) | 207 (28%) | 0.622 | 0.421 | 0.918 | **0.016** | 0.539 | 0.36 | 0.806 | **0.003** |
| Alcohol Drinking History | | 13 (6.8%) | 49 (9%) | 62 (8.4%) | 0.737 | 0.39 | 1.39 | 0.344 |  |  |  |  |
| Smoking History | | 17 (8.9%) | 71 (13%) | 88 (11.9%) | 0.65 | 0.372 | 1.134 | 0.127 |  |  |  |  |

OR: Odds Ratio; Upper and Lower: 95% CI (confidence interval);1+2: Vascular catheter+ Urinary catheter;1+3: Vascular catheter+ Mechanical ventilation;2+3: Urinary catheter+ Mechanical ventilation;1+2+3:Vascular catheter+ Urinary catheter+ Mechanical ventilation.
