# Supplementary material for: Epidemiology, Molecular Characteristics, and Clinical Risk Factors of Klebsiella pneumoniae Bloodstream Infections: A Nine-Year Retrospective Study (2016–2024)
Source: Research Square preprint supplement (doi:10.21203/rs.3.rs-7873537/v1), 2025-11-25
Supplement: Supplementary file 15 [file b63a84ef9897d9175dc33721.docx]

Table S9. Multivariable and Univariate analyses of Risk Factors for K11 and non-K1 in *Klebsiella pneumoniae* Bloodstream Infection. A p value of less than 0.05 was set as the threshold for significance.

| **Variables** | **K1 (n=82)** | | **Non-K1 (n=747)** | **Total**  **(n=829)** | **Univariate**  **analysis OR** | **Lower** | **Upper** | **P value** | **Multivariate analysis**  **OR** | **Lower** | **Upper** | **P value** |
| --- | --- | --- | --- | --- | --- | --- | --- | --- | --- | --- | --- | --- |
| Agender (male) | | 59 (72%) | 524 (70.1%) | 583 (70.3%) | 1.092 | 0.658 | 1.812 | 0.734 |  |  |  |  |
| Age≥60 | | 45 (54.9%) | 409 (54.8%) | 454 (54.8%) | 1.005 | 0.636 | 1.589 | 0.983 |  |  |  |  |
| Mortality | | 8 (9.8%) | 82 (11%) | 90 (10.9%) | 0.877 | 0.408 | 1.883 | 0.736 |  |  |  |  |
| Department (ICU) | | 23 (28%) | 183 (24.5%) | 206 (24.8%) | 1.201 | 0.722 | 2 | 0.48 |  |  |  |  |
| Malignancy | | 5 (6.1%) | 87 (11.6%) | 92 (11.1%) | 0.493 | 0.194 | 1.251 | 0.129 |  |  |  |  |
| Cardiovascular disease | | 11 (13.4%) | 136 (18.2%) | 147 (17.7%) | 0.696 | 0.3591 | 1.349 | 0.281 |  |  |  |  |
| Cerebrovascular disease | | 13 (15.9%) | 80 (10.7%) | 93 (11.2%) | 1.571 | 0.831 | 2.968 | 0.161 |  |  |  |  |
| Autoimmune disease | | 1 (1.2%) | 21 (2.8%) | 22 (2.7%) | 0.427 | 0.057 | 3.215 | 0.395 |  |  |  |  |
| Agranulocytosis | | 2 (2.4%) | 32 (4.3%) | 34 (4.1%) | 0.559 | 0.131 | 2.375 | 0.424 |  |  |  |  |
| Chronic renal insufficiency | | 13 (15.9%) | 64 (8.6%) | 77 (9.3%) | 2.011 | 1.054 | 3.835 | **0.031** | 2.077 | 1.068 | 4.036 | **0.031** |
| Chronic obstructive  pulmonary disease | | 1 (1.2%) | 6 (0.8%) | 7 (0.8%) | 1.525 | 0.181 | 12.822 | 0.696 |  |  |  |  |
| Pulmonary infection | | 33 (40.2%) | 320 (42.8%) | 353 (42.6%) | 0.899 | 0.565 | 1.43 | 0.652 |  |  |  |  |
| Urinary tract infection | | 3 (3.7%) | 71 (9.5%) | 74 (8.9%) | 0.362 | 0.111 | 1.175 | 0.078 |  |  |  |  |
| Biliary tract infection | | 14 (17.1%) | 128 (17.1%) | 142 (17.1%) | 0.996 | 0.543 | 1.825 | 0.989 |  |  |  |  |
| Hypertension | | 39 (47.6%) | 342 (45.8%) | 381 (46%) | 1.074 | 0.68 | 1.696 | 0.759 |  |  |  |  |
| Diabetes mellitus | | 25 (30.5%) | 236 (31.6%) | 261 (31.5%) | 0.95 | 0.579 | 1.558 | 0.838 |  |  |  |  |
| Invasive procedures | | 50 (61%) | 451 (60.4%) | 501 (60.4%) | 1.025 | 0.643 | 1.636 | 0.916 |  |  |  |  |
| Therapeutic procedure(catheter) | | 42 (51.2%) | 500 (66.9%) | 542 (65.4%) | 0.519 | 0.328 | 0.821 | **0.005** | 0.678 | 0.228 | 2.02 | 0.485 |
| Vascular catheter 1 | | 30 (36.6%) | 389 (52.1%) | 419 (50.5%) | 0.531 | 0.331 | 0.851 | **0.008** | 0.711 | 0.342 | 1.478 | 0.361 |
| Urinary catheter 2 | | 36 (43.9%) | 418 (56%) | 454 (54.8%) | 0.616 | 0.389 | 0.975 | **0.037** | 1.008 | 0.419 | 2.421 | 0.986 |
| Mechanical ventilation 3 | | 30 (36.6%) | 273 (36.5%) | 303 (36.6%) | 1.002 | 0.624 | 1.608 | 0.994 |  |  |  |  |
| 1+2 | | 24 (29.3%) | 256 (34.3%) | 280 (33.8%) | 0.794 | 0.482 | 1.307 | 0.363 |  |  |  |  |
| 1+3 | | 18 (22%) | 191 (25.6%) | 209 (25.2%) | 0.819 | 0.473 | 1.416 | 0.474 |  |  | . |  |
| 2+3 | | 22 (26.8%) | 208 (27.8%) | 230 (27.7%) | 0.95 | 0.568 | 1.589 | 0.845 |  |  |  |  |
| 1+2+3 | | 16 (19.5%) | 186 (24.9%) | 202 (24.4%) | 0.731 | 0.413 | 1.294 | 0.281 |  |  | . |  |
| Previous corticosteroid therapy | | 1 (1.2%) | 40 (5.4%) | 41 (4.9%) | 0.218 | 0.03 | 1.608 | 0.101 |  |  |  |  |
| Previous antibiotic therapy | | 13 (15.9%) | 210 (28.1%) | 223 (26.9%) | 0.482 | 0.261 | 0.89 | **0.017** | 0.551 | 0.295 | 1.027 | 0.06 |
| Alcohol Drinking History | | 6 (7.3%) | 57 (7.6%) | 63 (7.6%) | 0.956 | 0.399 | 2.29 | 0.919 |  |  |  |  |
| Smoking History | | 6 (7.3%) | 89 (11.9%) | 95 (11.5%) | 1 | 0.247 | 1.379 | 0.215 |  |  |  |  |

OR: Odds Ratio; Upper and Lower: 95% CI (confidence interval);1+2: Vascular catheter+ Urinary catheter;1+3: Vascular catheter+ Mechanical ventilation;2+3: Urinary catheter+ Mechanical ventilation;1+2+3:Vascular catheter+ Urinary catheter+ Mechanical ventilation.
