# Supplementary material for: Epidemiology, Molecular Characteristics, and Clinical Risk Factors of Klebsiella pneumoniae Bloodstream Infections: A Nine-Year Retrospective Study (2016–2024)
Source: Research Square preprint supplement (doi:10.21203/rs.3.rs-7873537/v1), 2025-11-25
Supplement: Supplementary file 16 [file badc0f3ec943c348a3e893e7.docx]

Table S18. Multivariable and Univariate analyses of Risk Factors for ST11 and ST23 in *Klebsiella pneumoniae* Bloodstream Infection. A p value of less than 0.05 was set as the threshold for significance.

| **Variables** | **ST11 (n=187)** | | **ST23 (n=86)** | **Total**  **(n=273)** | **Univariate**  **analysis OR** | **Lower** | **Upper** | **P value** | **Multivariate analysis**  **OR** | **Lower** | **Upper** | **P value** |
| --- | --- | --- | --- | --- | --- | --- | --- | --- | --- | --- | --- | --- |
| Agender (male) | | 132 (71%) | 69 (80.2%) | 201 (73.6%) | 0.591 | 0.319 | 1.096 | 0.093 |  |  |  |  |
| Age≥60 | | 110 (58.8%) | 42 (48.8%) | 152 (55.7%) | 1.497 | 0.896 | 2.501 | 0.123 |  |  |  |  |
| Mortality | | 58 (31%) | 11 (12.8%) | 69 (25.3%) | 3.006 | 1.515 | 6.202 | **0.001** | 1.228 | 0.52 | 2.9 | 0.64 |
| Department (ICU) | | 80 (42.8%) | 20 (23.3%) | 100 (36.6%) | 2.467 | 1.384 | 4.398 | **0.002** | 1.511 | 0.717 | 3.186 | 0.278 |
| Malignancy | | 29 (15.5%) | 4 (4.7%) | 33 (12.1%) | 3.763 | 1.279 | 11.067 | **0.011** | 2.201 | 0.615 | 7.88 | 0.225 |
| Cardiovascular disease | | 48 (25.7%) | 15 (17.4%) | 63 (23.1%) | 1.635 | 0.856 | 3.12 | 0.134 |  |  |  |  |
| Cerebrovascular disease | | 33 (17.6%) | 11 (12.8%) | 44 (16.1%) | 1.461 | 0.7 | 3.05 | 0.311 |  |  |  |  |
| Autoimmune disease | | 9 (4.8%) | 1 (1.2%) | 10 (3.7%) | 4.298 | 0.536 | 34.473 | 0.136 |  |  |  |  |
| Agranulocytosis | | 6 (3.2%) | 1 (1.2%) | 7 (2.6%) | 2.818 | 0.334 | 23.773 | 0.321 |  |  |  |  |
| Chronic renal insufficiency | | 7 (3.7%) | 10 (11.6%) | 17 (6.2%) | 0.296 | 0.108 | 0.805 | **0.012** | 0.323 | 0.094 | 1.107 | 0.072 |
| Chronic obstructive  pulmonary disease | | 3 (1.6%) | 2 (2.3%) | 5 (1.8%) | 0.685 | 0.112 | 4.175 | 0.68 |  |  |  |  |
| Pulmonary infection | | 107 (57.2%) | 37 (43%) | 144 (52.7%) | 1.771 | 1.057 | 2.967 | **0.029** | 0.876 | 0.456 | 1.683 | 0.692 |
| Urinary tract infection | | 27 (14.4%) | 7 (8.1%) | 34 (12.5%) | 1.904 | 0.795 | 4.564 | 0.143 |  |  |  |  |
| Biliary tract infection | | 36 (19.3%) | 4 (4.7%) | 40 (14.7%) | 4.887 | 1.681 | 14.212 | **0.002** | 4.172 | 1.301 | 13.376 | **0.016** |
| Hypertension | | 101 (54%) | 43 (50%) | 144 (52.7%) | 1.174 | 0.704 | 1.958 | 0.538 |  |  |  |  |
| Diabetes mellitus | | 60 (32.1%) | 26 (30.2%) | 86 (31.5%) | 1.09 | 0.627 | 1.896 | 0.759 |  |  |  |  |
| Invasive procedures | | 147 (78.6%) | 59 (68.6%) | 206 (75.5%) | 1.682 | 0.947 | 2.986 | 0.074 |  |  |  |  |
| Therapeutic procedure(catheter) | | 142 (75.9%) | 46 (53.5%) | 188 (68.9%) | 2.744 | 1.598 | 4.71 | **＜0.001** | 1.219 | 0.301 | 4.937 | 0.781 |
| Vascular catheter 1 | | 117 (62.6%) | 35 (40.7%) | 152 (55.7%) | 2.436 | 1.445 | 4.106 | **＜0.001** | 0.761 | 0.282 | 2.051 | 0.589 |
| Urinary catheter 2 | | 126 (67.4%) | 37 (43%) | 163 (59.7%) | 2.735 | 1.618 | 4.624 | **＜0.001** | 1.7 | 0.519 | 5.567 | 0.381 |
| Mechanical ventilation 3 | | 98 (52.4%) | 25 (29.1%) | 123 (45.1%) | 2.687 | 1.555 | 4.642 | **＜0.001** | 1.372 | 0.555 | 3.388 | 0.493 |
| 1+2 | | 29 (15.5%) | 21 (24.4%) | 50 (18.3%) | 0.568 | 0.302 | 1.068 | 0.077 |  |  |  |  |
| 1+3 | | 26 (13.9%) | 16 (18.6%) | 42 (15.4%) | 0.707 | 0.357 | 1.399 | 0.317 |  |  |  |  |
| 2+3 | | 31 (16.6%) | 20 (23.3%) | 51 (18.7%) | 0.656 | 0.349 | 1.233 | 0.188 |  |  |  |  |
| 1+2+3 | | 24 (12.8%) | 15 (17.4%) | 39 (14.3%) | 0.697 | 0.345 | 1.407 | 0.312 |  |  | . |  |
| Previous corticosteroid therapy | | 6 (3.2%) | 0 | 6 (2.2%) |  |  |  | 0.093 |  |  |  |  |
| Previous antibiotic therapy | | 107 (57.2%) | 10 (11.6%) | 117 (42.9%) | 10.165 | 4.947 | 20.886 | **＜0.001** | 6.64 | 2.907 | 15.165 | **＜0.001** |
| Alcohol Drinking History | | 18 (9.6%) | 7 (8.1%) | 25 (9.2%) | 1.202 | 0.482 | 2.995 | 0.692 |  |  |  |  |
| Smoking History | | 32 (17.1%) | 7 (8.1%) | 39 (14.3%) | 2.33 | 0.984 | 5.514 | **0.049** | 1.145 | 0.41 | 3.199 | 0.796 |

OR: Odds Ratio; Upper and Lower: 95% CI (confidence interval);1+2: Vascular catheter+ Urinary catheter;1+3: Vascular catheter+ Mechanical ventilation;2+3: Urinary catheter+ Mechanical ventilation;1+2+3:Vascular catheter+ Urinary catheter+ Mechanical ventilation.
