# Supplementary material for: Epidemiology, Molecular Characteristics, and Clinical Risk Factors of Klebsiella pneumoniae Bloodstream Infections: A Nine-Year Retrospective Study (2016–2024)
Source: Research Square preprint supplement (doi:10.21203/rs.3.rs-7873537/v1), 2025-11-25
Supplement: Supplementary file 17 [file c69d20914e9395621840642e.docx]

Table S16. Multivariable and Univariate analyses of Risk Factors for K47 and non-K47 in *Klebsiella pneumoniae* Bloodstream Infection. A p value of less than 0.05 was set as the threshold for significance.

| **Variables** | **K47 (n=68)** | | **Non-K47 (n=761)** | **Total**  **(n=829)** | **Univariate**  **analysis OR** | **Lower** | **Upper** | **P value** | **Multivariate analysis**  **OR** | **Lower** | **Upper** | **P value** |
| --- | --- | --- | --- | --- | --- | --- | --- | --- | --- | --- | --- | --- |
| Agender (male) | | 54 (79.4%) | 529 (69.5%) | 583 (70.3%) | 1.692 | 0.921 | 3.106 | 0.087 |  |  |  |  |
| Age≥60 | | 45 (66.2%) | 409 (53.7%) | 454 (54.8%) | 1.684 | 0.999 | 2.839 | **0.048** | 1.343 | 0.771 | 2.338 | 0.298 |
| Mortality | | 7 (10.3%) | 83 (10.9%) | 90 (10.9%) | 0.937 | 0.415 | 2.117 | 0.876 |  |  |  |  |
| Department (ICU) | | 20 (29.4%) | 186 (24.4%) | 206 (24.8%) | 1.288 | 0.745 | 2.226 | 0.364 |  |  |  |  |
| Malignancy | | 18 (26.5%) | 74 (9.7%) | 92 (11.1%) | 3.342 | 1.853 | 6.027 | **＜0.001** | 4.227 | 2.267 | 7.882 | **＜0.001** |
| Cardiovascular disease | | 14 (20.6%) | 133 (17.5%) | 147 (17.7%) | 1.224 | 0.661 | 2.269 | 0.52 |  |  |  |  |
| Cerebrovascular disease | | 10 (14.7%) | 83 (10.9%) | 93 (11.2%) | 1.408 | 0.693 | 2.861 | 0.342 |  |  |  |  |
| Autoimmune disease | | 3 (4.4%) | 19 (2.5%) | 22 (2.7%) | 1.802 | 0.52 | 6.252 | 0.347 |  |  |  |  |
| Agranulocytosis | | 1 (1.5%) | 33 (4.3%) | 34 (4.1%) | 0.329 | 0.044 | 2.445 | 0.254 |  |  |  |  |
| Chronic renal insufficiency | | 9 (13.2%) | 68 (8.9%) | 77 (9.3%) | 1.555 | 0.739 | 3.272 | 0.242 |  |  |  |  |
| Chronic obstructive  pulmonary disease | | 0 | 7 (0.9%) | 7 (0.8%) |  |  |  | 0.427 |  |  |  |  |
| Pulmonary infection | | 28 (41.2%) | 325 (42.7%) | 353 (42.6%) | 0.939 | 0.567 | 1.554 | 0.807 |  |  |  |  |
| Urinary tract infection | | 5 (7.4%) | 69 (9.1%) | 74 (8.9%) | 0.796 | 0.31 | 2.045 | 0.635 |  |  |  |  |
| Biliary tract infection | | 14 (20.6%) | 128 (16.8%) | 142 (17.1%) | 1.282 | 0.691 | 2.378 | 0.429 |  |  |  |  |
| Hypertension | | 39 (57.4%) | 342 (44.9%) | 381 (46%) | 1.648 | 0.998 | 2.72 | **0.049** | 1.33 | 0.771 | 2.293 | 0.305 |
| Diabetes mellitus | | 30 (44.1%) | 231 (30.4%) | 261 (31.5%) | 1.811 | 1.095 | 2.995 | **0.019** | 1.761 | 1.03 | 3.013 | **0.039** |
| Invasive procedures | | 42 (61.8%) | 459 (60.3%) | 501 (60.4%) | 1.063 | 0.638 | 1.77 | 0.815 |  |  |  |  |
| Therapeutic procedure(catheter) | | 48 (70.6%) | 494 (64.9%) | 542 (65.4%) | 1.297 | 0.754 | 2.231 | 0.346 |  |  |  |  |
| Vascular catheter 1 | | 35（51.5%) | 384 (50.5%) | 419 (50.5%) | 1.041 | 0.634 | 1.711 | 0.873 |  |  |  |  |
| Urinary catheter 2 | | 45 (66.2%) | 409 (53.7%) | 545 (54.8%) | 1.684 | 0.999 | 2.839 | **0.048** | 2.015 | 1.163 | 3.491 | **0.013** |
| Mechanical ventilation 3 | | 20 (29.4%) | 283 (37.2%) | 303 (36.6%) | 0.704 | 0.409 | 1.21 | 0.202 |  |  |  |  |
| 1+2 | | 35（51.5%) | 388 (51%) | 423 (51%) | 1.02 | 0.621 | 1.675 | 0.939 |  |  |  |  |
| 1+3 | | 19 (27.9%) | 246 (32.3%) | 265 (32%) | 0.812 | 0.468 | 1.408 | 0.458 |  |  |  |  |
| 2+3 | | 20 (29.4%) | 271 (35.6%) | 291 (35.1%) | 0.753 | 0.438 | 1.296 | 0.305 |  |  |  |  |
| 1+2+3 | | 19 (27.9%) | 237 (31.1%) | 256 (30.9%) | 0.857 | 0.494 | 1.488 | 0.584 |  |  |  |  |
| Previous corticosteroid therapy | | 4 (5.9%) | 37 (4.9%) | 41 (4.9%) | 1.223 | 0.423 | 3.54 | 0.71 |  |  |  |  |
| Previous antibiotic therapy | | 21 (30.9%) | 202 (26.5%) | 223 (26.9%) | 1.236 | 0.721 | 2.12 | 0.44 |  |  |  |  |
| Alcohol Drinking History | | 4 (5.9%) | 59 (7.8%) | 63 (7.6%) | 0.744 | 0.262 | 2.113 | 0.577 |  |  |  |  |
| Smoking History | | 6 (8.8%) | 89 (11.7%) | 95 (11.5%) | 0.731 | 0.307 | 1.738 | 0.476 |  |  |  |  |

OR: Odds Ratio; Upper and Lower: 95% CI (confidence interval);1+2: Vascular catheter+ Urinary catheter;1+3: Vascular catheter+ Mechanical ventilation;2+3: Urinary catheter+ Mechanical ventilation;1+2+3:Vascular catheter+ Urinary catheter+ Mechanical ventilation.
