# Supplementary material for: Epidemiology, Molecular Characteristics, and Clinical Risk Factors of Klebsiella pneumoniae Bloodstream Infections: A Nine-Year Retrospective Study (2016–2024)
Source: Research Square preprint supplement (doi:10.21203/rs.3.rs-7873537/v1), 2025-11-25
Supplement: Supplementary file 18 [file cb7a69c79f20809c222fa1b3.docx]

Table S1. Multivariable and Univariate analyses of Risk Factors for *rmpA* and non-*rmpA* in *Klebsiella pneumoniae* Bloodstream Infection. A p value of less than 0.05 was set as the threshold for significance.

| **Variables** | ***rmpA* (n=302）** | **Non-*rmpA* (n=529）** | **Total(n=831)** | **Univariate**  **analysis OR** | **Lower** | **Upper** | **P value** | **Multivariate analysis**  **OR** | **Lower** | **Upper** | **P value** |
| --- | --- | --- | --- | --- | --- | --- | --- | --- | --- | --- | --- |
| Agender (male) | 220 (72.8%) | 365 (69%) | 585 (70.4%) | 1.205 | 0.881 | 1.649 | 0.242 |  |  |  |  |
| Age≥60 | 177 (58.6%) | 279（52.7%) | 456 (54.9%) | 1.269 | 0.954 | 1.688 | 0.102 |  |  |  |  |
| Mortality | 30 (9.9%) | 62 (11.7%) | 92 (11.1%) | 0.831 | 0.524 | 1.317 | 0.43 |  |  |  |  |
| Department (ICU) | 81 (26.8%) | 131 (24.8%) | 212 (25.5%) | 1.114 | 0.807 | 1.537 | 0.513 |  |  |  |  |
| Malignancy | 27 (8.9%) | 64 (12.1%) | 91 (11%) | 0.713 | 0.444 | 1.146 | 0.161 |  |  |  |  |
| Cardiovascular disease | 57 (18.9%) | 94 (17.8%) | 151 (18.2%) | 1.077 | 0.748 | 1.55 | 0.691 |  |  |  |  |
| Cerebrovascular disease | 34 (11.3%) | 58 (11%) | 92（11.1%) | 1.03 | 0.657 | 1.614 | 0.897 |  |  |  |  |
| Autoimmune disease | 7 (2.3%) | 8 (1.5%) | 15 (1.8%) | 1.545 | 0.555 | 4.304 | 0.401 |  |  |  |  |
| Agranulocytosis | 9 (3%) | 27 (5.1%) | 36 (4.3%) | 0.571 | 0.265 | 1.231 | 0.148 |  |  |  |  |
| Chronic renal insufficiency | 19 (6.3%) | 58 (11%) | 77 (9.3%) | 0.545 | 0.318 | 0.934 | **0.025** | 0.511 | 0.297 | 0.877 | **0.015** |
| Chronic obstructive  pulmonary disease | 4 (1.3%) | 2 (0.4%) | 6 (0.7%) | 3.537 | 0.644 | 19.425 | 0.121 |  |  |  |  |
| Pulmonary infection | 129 (42.7%) | 220 (41.6%) | 349 (42%) | 1.047 | 0.787 | 1.394 | 0.751 |  |  |  |  |
| Urinary tract infection | 30 (9.9%) | 52（9.8%0 | 82 (9.9%) | 1.012 | 0.63 | 1.624 | 0.961 |  |  |  |  |
| Biliary tract infection | 37 (12.3%) | 103 (19.5%) | 140 (16.8%) | 0.577 | 0.385 | 0.866 | **0.007** | 0.553 | 0.368 | 0.831 | **0.004** |
| Hypertension | 135 (44.7%) | 245 (46.3%) | 380 (45.7%) | 0.937 | 0.705 | 1.245 | 0.654 |  |  |  |  |
| Diabetes mellitus | 108（35.8%) | 155 (29.3%) | 263 (31.6%) | 1.343 | 0.994 | 1.815 | 0.054 |  |  |  |  |
| Invasive procedures | 180 (59.6%) | 317 (59.9%) | 497 (59.8%) | 0.987 | 0.74 | 1.316 | 0.928 |  |  |  |  |
| Therapeutic procedure(catheter) | 195 (64.6%) | 352 (66.5%) | 547 (65.8%) | 0.916 | 0.681 | 1.233 | 0.564 |  |  |  |  |
| Vascular catheter 1 | 151 (50%) | 277 (52.4%) | 428 (51.5%) | 0.91 | 0.686 | 1.207 | 0.512 |  |  |  |  |
| Urinary catheter 2 | 163 (54%) | 299 (56.5%) | 462 (55.6%) | 0.902 | 0.679 | 1.199 | 0.477 |  |  |  |  |
| Mechanical ventilation 3 | 124 (41.1%) | 192 (36.3%) | 316 (38%) | 1.223 | 0.174 | 1.634 | 0.071 |  |  |  |  |
| 1+2 | 118（39.1%) | 228 (43.1%) | 346 (41.6%) | 0.847 | 0.635 | 1.129 | 0.257 |  |  |  |  |
| 1+3 | 101 (33.4%) | 172 (32.5%) | 273 (32.9%) | 1.043 | 0.772 | 1.408 | 0.784 |  |  |  |  |
| 2+3 | 120 (39.7%) | 188 (35.5%) | 308 (37.1%) | 1.196 | 0.894 | 1.6 | 0.228 |  |  |  |  |
| 1+2+3 | 97 (32.1%) | 168 (31.8%) | 265 (31.9%) | 1.107 | 0.751 | 1.377 | 0.914 |  |  |  |  |
| Previous corticosteroid therapy | 12 (4%) | 28 (5.3%) | 40 (4.8%) | 0.74 | 0.371 | 1.478 | 0.393 |  |  |  |  |
| Previous antibiotic therapy | 73 (24.2%) | 154（29.1%) | 227 (27.3%) | 0.776 | 0.562 | 1.073 | 0.124 |  |  |  |  |
| Alcohol Drinking History | 21 (7%) | 44 (8.3%) | 65 (7.8%) | 0.824 | 0.48 | 1.414 | 0.481 |  |  |  |  |
| Smoking History | 30 (9.9%) | 66 (12.5%) | 96 (11.6%) | 0.774 | 0.49 | 1.222 | 0.27 |  |  |  |  |

OR: Odds Ratio; Upper and Lower: 95% CI (confidence interval);1+2: Vascular catheter+ Urinary catheter;1+3: Vascular catheter+ Mechanical ventilation;2+3: Urinary catheter+ Mechanical ventilation;1+2+3:Vascular catheter+ Urinary catheter+ Mechanical ventilation.
