# Supplementary material for: Epidemiology, Molecular Characteristics, and Clinical Risk Factors of Klebsiella pneumoniae Bloodstream Infections: A Nine-Year Retrospective Study (2016–2024)
Source: Research Square preprint supplement (doi:10.21203/rs.3.rs-7873537/v1), 2025-11-25
Supplement: Supplementary file 19 [file cbcdfa2512e67bf8f0dfdf1a.docx]

Table S11. Multivariable and Univariate analyses of Risk Factors for K1 and K2 in *Klebsiella pneumoniae* Bloodstream Infection. A p value of less than 0.05 was set as the threshold for significance.

| **Variables** | **K1 (n=82)** | | **K2 (n=55)** | **Total** | **Univariate**  **analysis OR** | **Lower** | **Upper** | **P value** | **Multivariate analysis**  **OR** | **Lower** | **Upper** | **P value** |
| --- | --- | --- | --- | --- | --- | --- | --- | --- | --- | --- | --- | --- |
| Agender (male) | | 59 (72%) | 33 (60%) | 92 (67.2%) | 1.71 | 0.83 | 3.525 | 0.144 |  |  |  |  |
| Age≥60 | | 45 (54.9%) | 33 (60%) | 78 (56.9%) | 0.811 | 0.405 | 1.621 | 0.553 |  |  |  |  |
| Mortality | | 8 (9.8%) | 4 (7.3%) | 12 (8.8%) | 1.378 | 0.394 | 4.821 | 0.614 |  |  |  |  |
| Department (ICU) | | 23 (28%) | 14 (25.5%) | 37 (27%) | 1.142 | 0.526 | 2.477 | 0.737 |  |  |  |  |
| Malignancy | | 5 (6.1%) | 9 (16.4%) | 14 (10.2%) | 0.332 | 0.105 | 1.051 | 0.052 |  |  |  |  |
| Cardiovascular disease | | 11 (13.4%) | 10 (18.2%) | 21 (15.3%) | 0.697 | 0.274 | 1.775 | 0.448 |  |  |  |  |
| Cerebrovascular disease | | 13 (15.9%) | 5 (9.1%) | 18 (13.1%) | 1.884 | 0.631 | 5.625 | 0.251 |  |  |  |  |
| Autoimmune disease | | 1 (1.2%) | 0 | 1 (0.7%) |  |  |  | 0.411 |  |  |  |  |
| Agranulocytosis | | 2 (2.4%) | 2 (3.6%) | 4 (2.9%) | 0.663 | 0.091 | 4.849 | 0.683 |  |  |  |  |
| Chronic renal insufficiency | | 13 (15.9%) | 5 (9.1%) | 18 (13.1%) | 1.884 | 0.631 | 5.625 | 0.251 |  |  |  |  |
| Chronic obstructive  pulmonary disease | | 1 (1.2%) | 0 | 1 (0.7%) |  |  |  | 0.411 |  |  |  |  |
| Pulmonary infection | | 33 (40.2%) | 27 (49.1%) | 60 (43.8%) | 0.698 | 0.351 | 1.391 | 0.306 |  |  |  |  |
| Urinary tract infection | | 3 (3.7%) | 2 (3.6%) | 5 (3.6%) | 1.006 | 0.163 | 6.228 | 0.995 |  |  |  |  |
| Biliary tract infection | | 14 (17.1%) | 11 (20%) | 25 (18.2%) | 0.824 | 0.343 | 1.978 | 0.664 |  |  |  |  |
| Hypertension | | 39 (47.6%) | 26 (47.3%) | 65 (47.4%) | 1.012 | 0.51 | 2.005 | 0.974 |  |  |  |  |
| Diabetes mellitus | | 25 (30.5%) | 12 (21.8%) | 37 (27%) | 1.572 | 0.71 | 3.477 | 0.263 |  |  |  |  |
| Invasive procedures | | 50 (61%) | 28 (50.9%) | 78 (56.9%) | 1.507 | 0.756 | 3.004 | 0.243 |  |  |  |  |
| Therapeutic procedure(catheter) | | 42 (51.2%) | 33 (60%) | 75 (54.7%) | 0.7 | 0.35 | 1.398 | 0.311 |  |  |  |  |
| Vascular catheter 1 | | 30 (36.6%) | 29 (52.7%) | 59 (43.1%) | 0.517 | 0.258 | 1.036 | 0.061 |  |  |  |  |
| Urinary catheter 2 | | 36 (43.9%) | 25 (45.5%) | 61 (44.5%) | 0.939 | 0.472 | 1.867 | 0.858 |  |  |  |  |
| Mechanical ventilation 3 | | 30 (36.6%) | 19 (34.5%) | 49 (35.8%) | 1.093 | 0.535 | 2.234 | 0.807 |  |  |  |  |
| 1+2 | | 24 (29.3%) | 22 (40%) | 46 (33.6%) | 0.621 | 0.302 | 1.274 | 0.192 |  |  |  |  |
| 1+3 | | 18 (22%) | 18 (32.7%) | 36 (26.3%) | 0.578 | 0.268 | 1.247 | 0.16 |  |  |  |  |
| 2+3 | | 22 (26.8%) | 18 (32.7%) | 40 (29.2%) | 0.754 | 0.358 | 1.589 | 0.457 |  |  |  |  |
| 1+2+3 | | 16 (19.5%) | 17 (30.9%) | 33 (24.1%) | 0.542 | 0.246 | 1.195 | 0.126 |  |  |  |  |
| Previous corticosteroid therapy | | 1 (1.2%) | 0 | 1 (0.7%) |  |  |  | 0.411 |  |  |  |  |
| Previous antibiotic therapy | | 13 (15.9%) | 14 (25.5%) | 27 (19.7%) | 0.552 | 0.236 | 1.288 | 0.166 |  |  |  |  |
| Alcohol Drinking History | | 6 (7.3%) | 5 (9.1%) | 11 (9.1%) | 0.789 | 0.229 | 2.726 | 0.708 |  |  |  |  |
| Smoking History | | 6 (7.3%) | 6 (10.9%) | 12 (8.8%) | 0.645 | 0.197 | 2.113 | 0.466 |  |  |  |  |

OR: Odds Ratio; Upper and Lower: 95% CI (confidence interval);1+2: Vascular catheter+ Urinary catheter;1+3: Vascular catheter+ Mechanical ventilation;2+3: Urinary catheter+ Mechanical ventilation;1+2+3:Vascular catheter+ Urinary catheter+ Mechanical ventilation.
