# Supplementary material for: Epidemiology, Molecular Characteristics, and Clinical Risk Factors of Klebsiella pneumoniae Bloodstream Infections: A Nine-Year Retrospective Study (2016–2024)
Source: Research Square preprint supplement (doi:10.21203/rs.3.rs-7873537/v1), 2025-11-25
Supplement: Supplementary file 20 [file d0fe8997ef187b43b533c5e1.docx]

Table S7. Multivariable and Univariate analyses of Risk Factors for *rmpA2* and *iroN* in *Klebsiella pneumoniae* Bloodstream Infection. A p value of less than 0.05 was set as the threshold for significance.

| **Variables** | ***rmpA2* (n=192）** | | ***iroN* (n=664）** | **Total**  **(n=856)** | **Univariate**  **analysis**  **OR** | **Lower** | **Upper** | **P value** | **Multivariate analysis**  **OR** | **Lower** | **Upper** | **P value** |
| --- | --- | --- | --- | --- | --- | --- | --- | --- | --- | --- | --- | --- |
| Agender (male) | | 146 (76%) | 477 (71.8%) | 623 (72.8%) | 1.244 | 0.858 | 1.805 | 0.249 |  |  |  |  |
| Age≥60 | | 112 (58.3%) | 371 (55.9%) | 483 (56.4%) | 1.106 | 0.799 | 1.531 | 0.545 |  |  |  |  |
| Mortality | | 20 (10.4%) | 74 (11.1%) | 94 (11%) | 0.927 | 0.55 | 1.563 | 0.776 |  |  |  |  |
| Department (ICU) | | 56 (29.2%) | 176 (26.5%) | 232 (27.1%) | 1.142 | 0.8 | 1.629 | 0.465 |  |  |  |  |
| Malignancy | | 16 (8.3%) | 81 (12.2%) | 97 (11.3%) | 0.654 | 0.373 | 1.148 | 0.137 |  |  |  |  |
| Cardiovascular disease | | 28 (14.6%) | 129 (19.4%) | 157 (18.3%) | 0.708 | 0.454 | 1.104 | 0.127 |  |  |  |  |
| Cerebrovascular disease | | 24 (12.5%) | 81 (12.2%) | 105 (12.3%) | 1.028 | 0.632 | 1.673 | 0.911 |  |  |  |  |
| Autoimmune disease | | 5 (2.6%) | 14 (2.1%) | 19 (2.2%) | 1.241 | 0.441 | 3.491 | 0.681 |  |  |  |  |
| Agranulocytosis | | 6 (3.1%) | 28 (4.2%) | 34 (4%) | 0.733 | 0.299 | 1.796 | 0.495 |  |  |  |  |
| Chronic renal insufficiency | | 17 (8.9%) | 70 (10.5%) | 87 (10.2%) | 0.824 | 0.473 | 1.438 | 0.495 |  |  |  |  |
| Chronic obstructive  pulmonary disease | | 3 (1.6%) | 4 (0.6%) | 7 (0.8%) | 2.619 | 0.581 | 11.804 | 0.193 |  |  |  |  |
| Pulmonary infection | | 80 (41.7%) | 296 (44.6%) | 376 (43.9%) | 0.888 | 0.642 | 1.229 | 0.474 |  |  |  |  |
| Urinary tract infection | | 21 (10.9%) | 60 (9%) | 81 (9.5%) | 1.236 | 0.731 | 2.09 | 0.428 |  |  |  |  |
| Biliary tract infection | | 29 (15.1%) | 109 (16.4%) | 138 (16.1%) | 0.906 | 0.58 | 1.414 | 0.663 |  |  |  |  |
| Hypertension | | 95 (49.5%) | 312 (47%) | 407 (47.5%) | 1.105 | 0.801 | 1.524 | 0.543 |  |  |  |  |
| Diabetes mellitus | | 61 (31.8%) | 218 (32.8%) | 279 (32.6%) | 0.953 | 0.675 | 1.344 | 0.782 |  |  |  |  |
| Invasive procedures | | 136 (70.8%) | 374 (56.3%) | 510 (59.6%) | 1.883 | 1.331 | 2.664 | **＜0.001** | 1.883 | 1.331 | 2.664 | **＜0.001** |
| Therapeutic procedure(catheter) | | 131 (68.2%) | 452 (68.1%) | 583 (68.1%) | 1.007 | 0.713 | 1.422 | 0.967 |  |  |  |  |
| Vascular catheter 1 | | 101 (52.6%) | 363 (54.7%) | 464 (54.2%) | 0.92 | 0.667 | 1.27 | 0.613 |  |  |  |  |
| Urinary catheter 2 | | 115 (59.9%) | 382 (57.5%) | 497 (58.1%) | 1.103 | 0.795 | 1.529 | 0.559 |  |  |  |  |
| Mechanical ventilation 3 | | 90 (46.9%) | 266 (40.1%) | 356 (41.6%) | 1.32 | 0.956 | 1.824 | 0.092 |  |  |  |  |
| 1+2 | | 84 (43.8%) | 297 (44.7%) | 381 (44.5%) | 0.961 | 0.695 | 1.328 | 0.81 |  |  |  |  |
| 1+3 | | 73 (38%) | 234 (35.2%) | 307 (35.9%) | 1.127 | 0.809 | 1.571 | 0.479 |  |  |  |  |
| 2+3 | | 88 (45.8%) | 261 (39.3%) | 349 (40.8%) | 1.307 | 0.945 | 1.806 | 0.105 |  |  |  |  |
| 1+2+3 | | 71 (37%) | 229 (34.5%) | 300 (35%) | 1.115 | 0.798 | 1.556 | 0.524 |  |  |  |  |
| Previous corticosteroid therapy | | 5 (2.6%) | 33 (5%) | 38 (4.4%) | 0.511 | 0.197 | 1.328 | 0.161 |  |  |  |  |
| Previous antibiotic therapy | | 41 (21.4%) | 187 (28.2%) | 228 (26.6%) | 0.693 | 0.472 | 1.017 | 0.06 | 0.633 | 0.427 | 0.937 | **0.022** |
| Alcohol Drinking History | | 13 (6.8%) | 57 (8.6%) | 70 (8.2%) | 0.771 | 0.414 | 1.445 | 0.419 |  |  |  |  |
| Smoking History | | 17 (8.9%) | 85 (12.8%) | 102 (11.9%) | 0.662 | 0.383 | 1.144 | 0.137 |  |  |  |  |

OR: Odds Ratio; Upper and Lower: 95% CI (confidence interval);1+2: Vascular catheter+ Urinary catheter;1+3: Vascular catheter+ Mechanical ventilation;2+3: Urinary catheter+ Mechanical ventilation;1+2+3:Vascular catheter+ Urinary catheter+ Mechanical ventilation.
