# Supplementary material for: Epidemiology, Molecular Characteristics, and Clinical Risk Factors of Klebsiella pneumoniae Bloodstream Infections: A Nine-Year Retrospective Study (2016–2024)
Source: Research Square preprint supplement (doi:10.21203/rs.3.rs-7873537/v1), 2025-11-25
Supplement: Supplementary file 21 [file daf2adec7a92ba08da2c196d.docx]

Table S24. Multivariable and Univariate analyses of Risk Factors for ST11 and ST86 in *Klebsiella pneumoniae* Bloodstream Infection. A p value of less than 0.05 was set as the threshold for significance.

| **Variables** | **ST11 (n=187)** | | **ST86 (n=71)** | **Total**  **(n=158)** | **Univariate**  **analysis OR** | **Lower** | **Upper** | **P value** | **Multivariate analysis**  **OR** | **Lower** | **Upper** | **P value** |
| --- | --- | --- | --- | --- | --- | --- | --- | --- | --- | --- | --- | --- |
| Agender (male) | | 133 (71.1%) | 50 (70.4%) | 183 (70.9%) | 1.034 | 0.568 | 1.885 | 0.912 |  |  |  |  |
| Age≥60 | | 110 (58.8%) | 36 (50.7%) | 146 (56.6%) | 1.389 | 0.802 | 2.405 | 0.24 |  |  |  |  |
| Mortality | | 58 (31%) | 9 (12.7%) | 67 (26%) | 3.097 | 1.442 | 6.654 | **0.003** | 1.562 | 0.59 | 4.134 | 0.369 |
| Department (ICU) | | 80 (42.8%) | 18 (25.4%) | 98 (38%) | 2.201 | 1.198 | 4.044 | **0.01** | 0.406 | 0.153 | 1.075 | 0.07 |
| Malignancy | | 29 (15.5%) | 6 (8.5%) | 35 (13.6%) | 1.988 | 0.788 | 5.016 | 0.139 |  |  |  |  |
| Cardiovascular disease | | 47 (25.1%) | 13 (18.3%) | 60 (23.3%) | 1.498 | 0.754 | 2.975 | 0.247 |  |  |  |  |
| Cerebrovascular disease | | 32 (17.1%) | 5 (7%) | 37 (14.3%) | 1.017 | 7.302 | 1.505 | **0.039** | 2.725 | 1.017 | 7.302 | **0.046** |
| Autoimmune disease | | 9 (4.8%) | 0 | 9 (4.8%) |  |  |  | 0.06 |  |  |  |  |
| Agranulocytosis | | 6 (3.2%) | 7 (9.9%) | 13 (5%) | 0.303 | 0.098 | 0.935 | **0.029** | 0.204 | 0.041 | 1.011 | 0.052 |
| Chronic renal insufficiency | | 7 (3.7%) | 8 (11.3%) | 15 (5.8%) | 0.306 | 0.107 | 0.879 | **0.021** | 0.179 | 0.041 | 0.787 | **0.023** |
| Chronic obstructive  pulmonary disease | | 3 (1.6%) | 0 | 3 (1.2%) |  |  |  | 0.283 |  |  |  |  |
| Pulmonary infection | | 108 (57.8%) | 29 (40.8%) | 137 (53.1%) | 1.98 | 1.137 | 3.449 | **0.015** | 1.801 | 0.823 | 3.941 | 0.141 |
| Urinary tract infection | | 27 (14.4%) | 10 (14.1%) | 37 (14.3%) | 1.029 | 0.47 | 2.253 | 0.942 |  |  |  |  |
| Biliary tract infection | | 36 (19.3%) | 10 (14.1%) | 46 (17.8%) | 1.454 | 0.679 | 3.113 | 0.333 |  |  |  |  |
| Hypertension | | 101 (54%) | 31 (43.7%) | 132 (51.2%) | 1.515 | 0.874 | 2.627 | 0.138 |  |  |  |  |
| Diabetes mellitus | | 59 (31.6%) | 20 (28.2%) | 79 (30.6%) | 1.175 | 0.644 | 2.146 | 0.599 |  |  |  |  |
| Invasive procedures | | 147 (78.6%) | 34 (47.9%) | 181 (70.2%) | 3.999 | 2.234 | 7.159 | **＜0.001** | 4.771 | 2.105 | 10.812 | **＜0.001** |
| Therapeutic procedure(catheter) | | 142 (75.9%) | 42 (59.2%) | 184 (71.3%) | 2.179 | 1.22 | 3.891 | **0.008** | 4.025 | 2.013 | 8.051 | **＜0.001** |
| Vascular catheter 1 | | 117 (62.6%) | 27 (38%) | 144 (55.8%) | 2.724 | 1.551 | 4.784 | **＜0.001** | 2.112 | 1.061 | 4.204 | **0.033** |
| Urinary catheter 2 | | 126 (67.4%) | 35 (49.3%) | 161 (62.4%) | 2.125 | 1.218 | 3.707 | **0.007** | 1.261 | 0.574 | 2.774 | 0.563 |
| Mechanical ventilation 3 | | 98 (52.4%) | 24 (33.8%) | 122 (47.3%) | 2.156 | 1.22 | 3.811 | **0.008** | 1.226 | 0.52 | 2.89 | 0.642 |
| 1+2 | | 29 (15.5%) | 21 (29.6%) | 50 (19.4%) | 0.437 | 0.229 | 0.833 | **0.011** | 0.649 | 0.228 | 1.847 | 0.418 |
| 1+3 | | 26 (13.9%) | 18 (25.4%) | 44 (17.1%) | 0.476 | 0.242 | 0.935 | **0.029** | 0.476 | 0.242 | 0.935 | **0.031** |
| 2+3 | | 31 (16.6%) | 24 (33.8%) | 55 (21.3%) | 0.389 | 0.208 | 0.727 | **0.003** | 1.369 | 0.88 | 2.13 | 0.164 |
| 1+2+3 | | 24 (12.8%) | 18 (25.4%) | 42 (16.3%) | 0.434 | 0.218 | 0.86 | **0.015** | 0.775 | 0.494 | 1.216 | 0.268 |
| Previous corticosteroid therapy | | 6 (3.2%) | 2 (2.8%) | 8 (3.1%) | 1.144 | 0.225 | 5.803 | 0.871 |  |  |  |  |
| Previous antibiotic therapy | | 107 (57.2%) | 23 (32.4%) | 130 (50.4%) | 2.791 | 1.57 | 4.962 | **＜0.001** | 0.636 | 0.298 | 1.36 | 0.243 |
| Alcohol Drinking History | | 18 (9.6%) | 12 (16.9%) | 30 (11.6%) | 0.524 | 0.238 | 1.152 | 0.103 |  |  |  |  |
| Smoking History | | 32 (17.1%) | 11 (15.5%) | 43 (16.7%) | 1.126 | 0.534 | 2.377 | 0.755 |  |  |  |  |

OR: Odds Ratio; Upper and Lower: 95% CI (confidence interval);1+2: Vascular catheter+ Urinary catheter;1+3: Vascular catheter+ Mechanical ventilation;2+3: Urinary catheter+ Mechanical ventilation;1+2+3:Vascular catheter+ Urinary catheter+ Mechanical ventilation.
