# Supplementary material for: Epidemiology, Molecular Characteristics, and Clinical Risk Factors of Klebsiella pneumoniae Bloodstream Infections: A Nine-Year Retrospective Study (2016–2024)
Source: Research Square preprint supplement (doi:10.21203/rs.3.rs-7873537/v1), 2025-11-25
Supplement: Supplementary file 22 [file e66d3d3ad0c045638cfaa63d.docx]

Table S15. Multivariable and Univariate analyses of Risk Factors for K47 and K64 in *Klebsiella pneumoniae* Bloodstream Infection. A p value of less than 0.05 was set as the threshold for significance.

| **Variables** | **K47 (n=68)** | | **K64 (n=399)** | **Total**  **(n=467)** | **Univariate**  **analysis OR** | **Lower** | **Upper** | **P value** | **Multivariate analysis**  **OR** | **Lower** | **Upper** | **P value** |
| --- | --- | --- | --- | --- | --- | --- | --- | --- | --- | --- | --- | --- |
| Agender (male) | | 54 (79.4%) | 293 (73.4%) | 347 (74.3%) | 0.717 | 0.382 | 1.343 | 0.297 |  |  |  |  |
| Age≥60 | | 45 (66.2%) | 206 (51.6%) | 251 (53.7%) | 0.546 | 0.318 | 0.936 | **0.026** | 1.528 | 0.874 | 2.673 | 0.137 |
| Mortality | | 7 (10.3%) | 52 (13%) | 59 (12.6%) | 1.306 | 0.567 | 3.009 | 0.53 |  |  |  |  |
| Department (ICU) | | 20 (29.4%) | 121 (30.3%) | 141 (30.2%) | 1.045 | 0.595 | 1.835 | 0.879 |  |  |  |  |
| Malignancy | | 18 (26.5%) | 48 (12%) | 66 (14.1%) | 0.38 | 0.205 | 0.704 | **0.002** | 2.895 | 1.521 | 5.509 | **0.001** |
| Cardiovascular disease | | 14 (20.6%) | 81 (20.3%) | 95 (20.3%) | 0.982 | 0.52 | 1.857 | 0.957 |  |  |  |  |
| Cerebrovascular disease | | 10 (14.7%) | 47 (11.8%) | 57 (12.2%) | 0.774 | 0.371 | 1.618 | 0.496 |  |  |  |  |
| Autoimmune disease | | 3 (4.4%) | 9 (2.3%) | 12 (2.6%) | 0.5 | 0.132 | 1.896 | 0.299 |  |  |  |  |
| Agranulocytosis | | 1 (1.5%) | 17 (4.3%) | 18 (3.9%) | 2.982 | 0.39 | 22.781 | 0.269 |  |  |  |  |
| Chronic renal insufficiency | | 9 (13.2%) | 37 (9.3%) | 46 (9.9%) | 0.67 | 0.308 | 1.46 | 0.311 |  |  |  |  |
| Chronic obstructive  pulmonary disease | | 0 | 3 (0.8%) | 3 (0.6%) | 0.473 |  |  | 0.519 |  |  |  |  |
| Pulmonary infection | | 28 (41.2%) | 191 (47.9%) | 219 (46.9%) | 1.312 | 0.779 | 2.21 | 0.307 |  |  |  |  |
| Urinary tract infection | | 5 (7.4%) | 46 (11.5%) | 51 (10.9%) | 1.642 | 0.628 | 4.293 | 0.307 |  |  |  |  |
| Biliary tract infection | | 14 (20.6%) | 64 (16%) | 78 (16.7%) | 0.737 | 0.386 | 1.406 | 0.353 |  |  |  |  |
| Hypertension | | 39 (57.4%) | 184 (46.1%) | 223 (47.8%) | 0.636 | 0.379 | 1.07 | 0.086 |  |  |  |  |
| Diabetes mellitus | | 30 (44.1%) | 122 (30.6%) | 152 (32.5%) | 0.558 | 0.33 | 0.942 | **0.028** | 1.758 | 1.019 | 3.033 | **0.043** |
| Invasive procedures | | 42 (61.8%) | 221 (55.4%) | 263 (56.3%) | 0.769 | 0.454 | 1.302 | 0.327 |  |  |  |  |
| Therapeutic procedure(catheter) | | 48 (70.6%) | 278 (69.7%) | 326 (69.8%) | 0.957 | 0.454 | 1.682 | 0.879 |  |  |  |  |
| Vascular catheter 1 | | 35（51.5%) | 217 (54.4%) | 252 (54%) | 1.124 | 0.672 | 1.881 | 0.656 |  |  |  |  |
| Urinary catheter 2 | | 45 (66.2%) | 227 (56.9%) | 272 (58.2%) | 0.675 | 0.393 | 1.158 | 0.151 |  |  |  |  |
| Mechanical ventilation 3 | | 20 (29.4%) | 156 (39.1%) | 176 (37.7%) | 1.541 | 0.881 | 2.695 | 0.128 |  |  |  |  |
| 1+2 | | 32 (47.1%) | 135 (33.8%) | 167 (35.8%) | 1.738 | 1.034 | 2.922 | **0.035** | 1.913 | 1.114 | 3.285 | **0.019** |
| 1+3 | | 19 (27.9%) | 103 (25.8%) | 122 (26.1%) | 1.114 | 0.627 | 1.981 | 0.712 |  |  |  |  |
| 2+3 | | 20 (29.4%) | 110 (27.6%) | 130 (27.8%) | 1.095 | 0.622 | 1.928 | 0.754 |  |  |  |  |
| 1+2+3 | | 19 (27.9%) | 101 (25.3%) | 120 (25.7%) | 1.144 | 0.643 | 2.035 | 0.647 |  |  |  |  |
| Previous corticosteroid therapy | | 4 (5.9%) | 24 (6%) | 28 (6%) | 1.024 | 0.344 | 3.049 | 0.966 |  |  |  |  |
| Previous antibiotic therapy | | 21 (30.9%) | 129 (32.3%) | 150 (32.1%) | 1.069 | 0.614 | 1.864 | 0.813 |  |  |  |  |
| Alcohol Drinking History | | 4 (5.9%) | 32 (8%) | 36 (7.7%) | 1.395 | 0.477 | 4.079 | 0.541 |  |  |  |  |
| Smoking History | | 6 (8.8%) | 56 (14%) | 62 (13.3%) | 1.687 | 0.697 | 4.085 | 0.242 |  |  |  |  |

OR: Odds Ratio; Upper and Lower: 95% CI (confidence interval);1+2: Vascular catheter+ Urinary catheter;1+3: Vascular catheter+ Mechanical ventilation;2+3: Urinary catheter+ Mechanical ventilation;1+2+3:Vascular catheter+ Urinary catheter+ Mechanical ventilation.
