# Supplementary material for: Epidemiology, Molecular Characteristics, and Clinical Risk Factors of Klebsiella pneumoniae Bloodstream Infections: A Nine-Year Retrospective Study (2016–2024)
Source: Research Square preprint supplement (doi:10.21203/rs.3.rs-7873537/v1), 2025-11-25
Supplement: Supplementary file 23 [file fbccb5b7726eba22f19e4c5e.docx]

Table S5. Multivariable and Univariate analyses of Risk Factors for *iutA* and *iroN* in *Klebsiella pneumoniae* Bloodstream Infection. A p value of less than 0.05 was set as the threshold for significance.

| **Variables** | | ***iutA* (n=546)** | ***iroN* (n=664）** | **Total**  **(n=1210)** | **Univariate**  **analysis**  **OR** | **Lower** | **Upper** | **P value** | **Multivariate analysis**  **OR** | **Lower** | **Upper** | **P value** |
| --- | --- | --- | --- | --- | --- | --- | --- | --- | --- | --- | --- | --- |
| Agender (male) | 391 (71.6%) | | 477 (71.8%) | 868 (71.7%) | 0.989 | 0.769 | 1.272 | 0.931 |  |  |  |  |
| Age≥60 | 304 (55.7%) | | 371 (55.9%) | 675 (55.8%) | 0.992 | 0.79 | 1.246 | 0.946 |  |  |  |  |
| Mortality | 61 (11.2%) | | 74 (11.1%) | 135 (11.2%) | 1.003 | 0.7 | 1.437 | 0.988 |  |  |  |  |
| Department (ICU) | 147 (26.9%) | | 176 (26.5%) | 323 (26.7%) | 1.022 | 0.791 | 1.319 | 0.87 |  |  |  |  |
| Malignancy | 63 (11.5%) | | 81 (12.2%) | 144 (11.9%) | 0.939 | 0.661 | 1.333 | 0.724 |  |  |  |  |
| Cardiovascular disease | 98 (17.9%) | | 129 (19.4%) | 227 (18.8%) | 0.907 | 0.678 | 1.214 | 0.512 |  |  |  |  |
| Cerebrovascular disease | 63 (11.5%) | | 81 (12.2%) | 144 (11.9%) | 0.939 | 0.661 | 1.333 | 0.724 |  |  |  |  |
| Autoimmune disease | 13 (2.4%) | | 14 (2.1%) | 27 (2.2%) | 1.132 | 0.528 | 2.43 | 0.749 |  |  |  |  |
| Agranulocytosis | 21 (3.8%) | | 28 (4.2%) | 49 (4%) | 0.909 | 0.51 | 1.619 | 0.745 |  |  |  |  |
| Chronic renal insufficiency | 44 (8.1%) | | 70 (10.5%) | 114 (9.4%) | 0.744 | 0.501 | 1.104 | 0.141 |  |  |  |  |
| Chronic obstructive  pulmonary disease | 4 (0.7%) | | 4 (0.6%) | 8 (0.7%) | 1.218 | 0.303 | 4.892 | 0.781 |  |  |  |  |
| Pulmonary infection | 235 (43%) | | 296 (44.6%) | 531 (43.9%) | 0.939 | 0.748 | 1.18 | 0.592 |  |  |  |  |
| Urinary tract infection | 53 (9.7%) | | 60 (9%) | 113 (9.3%) | 1.082 | 0.734 | 1.595 | 0.69 |  |  |  |  |
| Biliary tract infection | 96 (17.6%) | | 109 (16.4%) | 205 (16.9%) | 1.086 | 0.804 | 1.468 | 0.59 |  |  |  |  |
| Hypertension | 256 (46.9%) | | 312 (47%) | 568 (46.9%) | 0.996 | 0.794 | 1.25 | 0.972 |  |  |  |  |
| Diabetes mellitus | 181 (33.2%) | | 218 (32.8%) | 399 (33%) | 1.015 | 0.797 | 1.291 | 0.907 |  |  |  |  |
| Invasive procedures | 305 (55.9%) | | 374 (56.3%) | 679 (56.1%) | 0.981 | 0.781 | 1.233 | 0.871 |  |  |  |  |
| Therapeutic procedure(catheter) | 356 (65.2%) | | 452 (68.1%) | 808 (66.8%) | 0.879 | 0.691 | 1.117 | 0.291 |  |  |  |  |
| Vascular catheter 1 | 287 (52.6%) | | 363 (54.7%) | 650 (53.7%) | 0.919 | 0.732 | 1.153 | 0.465 |  |  |  |  |
| Urinary catheter 2 | 305 (55.9%) | | 382 (57.5%) | 687 (56.8%) | 0.934 | 0.743 | 1.174 | 0.56 |  |  |  |  |
| Mechanical ventilation 3 | 209 (38.3%) | | 266 (40.1%) | 475 (39.3%) | 0.928 | 0.736 | 1.17 | 0.528 |  |  |  |  |
| 1+2 | 237 (43.4%) | | 297 (44.7%) | 534 (44.1%) | 0.948 | 0.754 | 1.191 | 0.645 |  |  |  |  |
| 1+3 | 188 (34.4%) | | 234 (35.2%) | 422 (34.9%) | 0.965 | 0.761 | 1.224 | 0.769 |  |  |  |  |
| 2+3 | 204 (37.4%) | | 261 (39.3%) | 465 (38.4%) | 0.921 | 0.73 | 1.163 | 0.489 |  |  |  |  |
| 1+2+3 | 183 (33.5%) | | 229 (34.5%) | 412 (34%) | 0.958 | 0.754 | 1.216 | 0.723 |  |  |  |  |
| Previous corticosteroid therapy | 25 (4.6%) | | 33 (5%) | 58 (4.8%) | 0.918 | 0.539 | 1.563 | 0.751 |  |  |  |  |
| Previous antibiotic therapy | 166 (30.4%) | | 187 (28.2%) | 353 (29.2%) | 1.114 | 0.869 | 1.429 | 0.394 |  |  |  |  |
| Alcohol Drinking History | 49 (9%) | | 57 (8.6%) | 106 (8.8%) | 1.05 | 0.704 | 1.566 | 0.811 |  |  |  |  |
| Smoking History | 71 (13%) | | 85 (12.8%) | 156 (12.9%) | 1.018 | 0.726 | 1.427 | 0.917 |  |  |  |  |

OR: Odds Ratio; Upper and Lower: 95% CI (confidence interval);1+2: Vascular catheter+ Urinary catheter;1+3: Vascular catheter+ Mechanical ventilation;2+3: Urinary catheter+ Mechanical ventilation;1+2+3:Vascular catheter+ Urinary catheter+ Mechanical ventilation.
