# Supplementary material for: Epidemiology, Molecular Characteristics, and Clinical Risk Factors of Klebsiella pneumoniae Bloodstream Infections: A Nine-Year Retrospective Study (2016–2024)
Source: Research Square preprint supplement (doi:10.21203/rs.3.rs-7873537/v1), 2025-11-25
Supplement: Supplementary file 24 [file fc1ec45fbc4899cf06ceb009.docx]

Table S19. Multivariable and Univariate analyses of Risk Factors for ST65 and non-ST65 in *Klebsiella pneumoniae* Bloodstream Infection. A p value of less than 0.05 was set as the threshold for significance.

| **Variables** | **ST65 (n=48)** | | **Non-ST65 (n=783)** | **Total**  **(n=831)** | **Univariate**  **analysis**  **OR** | **Lower** | **Upper** | **P value** | **Multivariate analysis**  **OR** | **Lower** | **Upper** | **P value** |
| --- | --- | --- | --- | --- | --- | --- | --- | --- | --- | --- | --- | --- |
| Agender (male) | | 31 (64.6%) | 554 (70.8) | 585 (70.4%) | 0.754 | 0.409 | 1.389 | 0.363 |  |  |  |  |
| Age≥60 | | 25 (52.1%) | 431 (55%) | 456 (54.9%) | 0.888 | 0.495 | 1.591 | 0.689 |  |  |  |  |
| Mortality | | 14 (29.2%) | 78 (10%) | 92 (11.1%) | 3.722 | 1.914 | 7.236 | **＜0.001** | 1.912 | 0.923 | 3.96 | 0.081 |
| Department (ICU) | | 13 (27.1%) | 199 (25.4%) | 212 (25.5%) | 1.09 | 0.565 | 2.102 | 0.797 |  |  |  |  |
| Malignancy | | 12 (25%) | 79 (10.1%) | 91 (11%) | 2.97 | 1.485 | 5.943 | **0.001** | 1.837 | 0.873 | 3.865 | 0.109 |
| Cardiovascular disease | | 8 (16.7%) | 143 (18.3%) | 151 (18.2%) | 0.895 | 0.41 | 1.954 | 0.781 |  |  |  |  |
| Cerebrovascular disease | | 11 (22.9%) | 81 (10.3%) | 92（11.1%) | 2.577 | 1.265 | 5.248 | **0.007** | 2.236 | 1.04 | 4.807 | **0.039** |
| Autoimmune disease | | 1 (2.1%) | 14 (1.8%) | 15 (1.8%) | 1.169 | 0.15 | 9.078 | 0.881 |  |  |  |  |
| Agranulocytosis | | 2 (4.2%) | 34 (4.3%) | 36 (4.3%) | 0.958 | 0.223 | 4.111 | 0.954 |  |  |  |  |
| Chronic renal insufficiency | | 4 (8.3%) | 73 (9.3%) | 77 (9.3%) | 0.884 | 0.309 | 2.531 | 0.818 |  |  |  |  |
| Chronic obstructive  pulmonary disease | | 1 (2.1%) | 5 (0.6%) | 6 (0.7%) | 3.311 | 0.379 | 28.912 | 0.251 |  |  |  |  |
| Pulmonary infection | | 15 (31.1%) | 334 (42.7%) | 349 (42%) | 0.611 | 0.327 | 1.143 | 0.12 |  |  |  |  |
| Urinary tract infection | | 1 (2.1%) | 81 (10.3%) | 82 (9.9%) | 0.184 | 0.025 | 1.354 | 0.062 |  |  |  |  |
| Biliary tract infection | | 6 (12.5%) | 134 (17.1%) | 140 (16.8%) | 0.692 | 0.288 | 1.66 | 0.407 |  |  |  |  |
| Hypertension | | 17 (35.4%) | 363 (46.4%) | 380 (45.7%) | 0.634 | 0.345 | 1.165 | 0.14 |  |  |  |  |
| Diabetes mellitus | | 8 (16.7%) | 255 (32.6%) | 263 (31.6%) | 0.414 | 1.191 | 0.898 | **0.021** | 0.381 | 0.172 | 0.845 | **0.018** |
| Invasive procedures | | 34 (70.8%) | 463 (59.1%) | 497 (59.8%) | 1.678 | 0.886 | 3.178 | 0.108 |  |  |  |  |
| Therapeutic procedure(catheter) | | 30 (62.5%) | 517 (66%) | 547 (65.8%) | 0.858 | 0.469 | 1.567 | 0.617 |  |  |  |  |
| Vascular catheter 1 | | 22 (45.8%) | 406 (51.9%) | 428 (51.5%) | 0.786 | 0.438 | 1.41 | 0.418 |  |  |  |  |
| Urinary catheter 2 | | 26 (54.2%) | 436 (55.7%) | 462 (55.6%) | 0.941 | 0.524 | 1.688 | 0.837 |  |  |  |  |
| Mechanical ventilation 3 | | 23 (47.9%) | 293 (37.4%) | 316 (38%) | 1.539 | 0.858 | 2.76 | 0.146 |  |  |  |  |
| 1+2 | | 16 (33.3%) | 256 (32.7%) | 272 (32.7%) | 1.029 | 0.555 | 1.91 | 0.927 |  |  |  |  |
| 1+3 | | 4 (8.3%) | 197 (25.2%) | 201 (24.2%) | 0.27 | 0.096 | 0.762 | **0.008** | 0.381 | 0.000 |  | 0.999 |
| 2+3 | | 8 (16.7%) | 222（28.4%) | 230 (27.7%) | 0.505 | 0.233 | 1.097 | 0.079 |  |  |  |  |
| 1+2+3 | | 4 (8.3%) | 191 (24.4%) | 195 (23.5%) | 0.282 | 0.1 | 0.794 | **0.011** | 0.282 | 0.1 | 0.794 | **0.017** |
| Previous corticosteroid therapy | | 1 (2.1%) | 39 (5%) | 40 (4.8%) | 0.406 | 0.055 | 3.019 | 0.363 |  |  |  |  |
| Previous antibiotic therapy | | 30 (62.5%) | 197 (25.2%) | 227 (27.3%) | 4.958 | 2.704 | 9.09 | **＜0.001** | 3.283 | 1.697 | 6.35 | **＜0.001** |
| Alcohol Drinking History | | 6 (12.5%) | 59 (7.5%) | 65 (7.8%) | 1.753 | 0.716 | 4.293 | 0.214 |  |  |  |  |
| Smoking History | | 6 (12.5%) | 90 (11.5%) | 96 (11.6%) | 1.1 | 0.455 | 2.66 | 0.832 |  |  |  |  |

OR: Odds Ratio; Upper and Lower: 95% CI (confidence interval);1+2: Vascular catheter+ Urinary catheter;1+3: Vascular catheter+ Mechanical ventilation;2+3: Urinary catheter+ Mechanical ventilation;1+2+3:Vascular catheter+ Urinary catheter+ Mechanical ventilation.
